# Supplementary material
Source: publisher site journal article supplement (https://www.dovepress.com/article/604314)
Supplement: Supplementary file 1 [file 604314%20Supplementary%20Material.docx]

**Supplementary Material Table 1.** Total Number of Emergency Calls by CBD Category from 2012–2022, Stratified by Age Group

| CBD Category | Age < 18 years | Age 18-59 years | Age ≥ 60 years |
| --- | --- | --- | --- |
| 1 | 162,623 (8.8) | 770,707 (10.5) | 613,490 (12.7) |
| 2 | 20,006 (1.1) | 48,776 (0.7) | 18,080 (0.4) |
| 3 | 31,933 (1.7) | 66,605 (0.9) | 30,577 (0.6) |
| 4 | 6,314 (0.3) | 96,979 (1.3) | 78,932 (1.6) |
| 5 | 69,179 (3.8) | 409,352 (5.6) | 643,743 (13.4) |
| 6 | 159 (0) | 6,334 (0.1) | 8,047 (0.2) |
| 7 | 10,564 (0.6) | 183,444 (2.5) | 180,467 (3.7) |
| 8 | 3,419 (0.2) | 3,687 (0.1) | 10,817 (0.2) |
| 9 | 1,108 (0.1) | 92,799 (1.3) | 194,167 (4) |
| 10 | 2,290 (0.1) | 9,541 (0.1) | 2,457 (0.1) |
| 12 | 19,540 (1.1) | 184,645 (2.5) | 188,572 (3.9) |
| 13 | 6,657 (0.4) | 125,279 (1.7) | 14,147 (0.3) |
| 14 | 7,641 (0.4) | 46,194 (0.6) | 7,945 (0.2) |
| 15 | 33,915 (1.8) | 266,987 (3.7) | 2,219 (0.1) |
| 16 | 32,218 (1.8) | 293,904 (4) | 96,803 (2) |
| 17 | 161,340 (8.8) | 1,229,116 (16.8) | 1,605,963 (33.3) |
| 18 | 651 (0) | 56,873 (0.8) | 90,355 (1.9) |
| 19 | 21,795 (1.2) | 255,820 (3.5) | 278,686 (5.8) |
| 20 | 462,687 (25.1) | 3,895 (0.1) | 2,543 (0.1) |
| 21 | 23,790 (1.3) | 197,936 (2.7) | 17,836 (0.4) |
| 22 | 7,166 (0.4) | 22,607 (0.3) | 5,413 (0.1) |
| 23 | 5,620 (0.3) | 8,060 (0.1) | 1,899 (0) |
| 24 | 171,433 (9.3) | 555,951 (7.6) | 394,924 (8.2) |
| 25 | 580,728 (31.5) | 2,385,384 (32.6) | 331,165 (6.9) |
| Total | 1,842,776 (13.2) | 7,320,875 (52.3) | 4,819,247 (34.5) |

**Footnote:** Values are presented as number of emergency calls, with percentages in parentheses indicating the proportion within each age-group analysis dataset. Age groups were categorized as children and adolescents (<18 years), adults (18–59 years), and older adults (≥60 years), based on prior demographic and EMS-related literature(10). CBD = Criteria-Based Dispatch. CBD categories represent symptom-based dispatch classifications assigned during emergency telephone triage and do not necessarily reflect final confirmed clinical diagnoses. Records with missing age-group data were excluded from this subgroup analysis.

**Supplementary Material Table 2.** Distribution of Total Emergency Calls by CBD Category among Individuals Aged < 18 Years from 2012 to 2022 with Long-term Trend Analyses

| **Age < 18** | **2012** | **2013** | **2014** | **2015** | **2016** | **2017** | **2018** | **2019** | **2020** | **2021** | **2022** | **Total** | **P for Trend (Number)** | **Mean Annual Percent Change (%)** | **95%CI (%)** | | **P for Trend (Percentage)** |
| --- | --- | --- | --- | --- | --- | --- | --- | --- | --- | --- | --- | --- | --- | --- | --- | --- | --- |
| **Total Calls** | 167,357 (9.1) | 175,959 (9.6) | 169,476 (9.2) | 151,874 (8.2) | 201,774 (11) | 179,843 (9.8) | 195,227 (10.6) | 191,894 (10.4) | 141,340 (7.7) | 125,966 (6.8) | 142,066 (7.7) | 1,842,776 | 0.207 |  | | | |
| **CBD Category** | | | | | | | | | | | | | | | | | |
| 1 | 16,830 (10.1) | 16,932 (9.6) | 16,516 (9.8) | 13,738 (9.1) | 18,443 (9.1) | 14,476 (8.1) | 18,244 (9.4) | 16,401 (8.6) | 12,123 (8.6) | 8,865 (7) | 10,055 (7.1) | 162,623 (8.8) | 0.019 | -0.27 | -0.38 | -0.16 | <0.001* |
| 2 | 1,322 (0.8) | 1,240 (0.7) | 1,476 (0.9) | 1,413 (0.9) | 1,831 (0.9) | 2,044 (1.1) | 2,320 (1.2) | 2,122 (1.1) | 1,979 (1.4) | 2,028 (1.6) | 2,231 (1.6) | 20,006 (1.1) | 0.001 | 0.09 | 0.07 | 0.11 | <0.001* |
| 3 | 3,768 (2.3) | 3,343 (1.9) | 3,582 (2.1) | 2,861 (1.9) | 3,192 (1.6) | 3,180 (1.8) | 3,660 (1.9) | 2,575 (1.3) | 2,053 (1.5) | 1,905 (1.5) | 1,814 (1.3) | 31,933 (1.7) | 0.001 | -0.08 | -0.12 | -0.05 | <0.001* |
| 4 | 630 (0.4) | 554 (0.3) | 738 (0.4) | 537 (0.4) | 648 (0.3) | 616 (0.3) | 684 (0.4) | 601 (0.3) | 487 (0.3) | 400 (0.3) | 419 (0.3) | 6,314 (0.3) | 0.034 | -0.01 | -0.01 | 0 | 0.07 |
| 5 | 6,668 (4) | 6,976 (4) | 6,594 (3.9) | 6,047 (4) | 6,972 (3.5) | 6,401 (3.6) | 6,896 (3.5) | 5581 (2.9) | 4,280 (3) | 6,325 (5) | 6,439 (4.5) | 69,179 (3.8) | 0.166 | 0.02 | -0.12 | 0.16 | 0.74 |
| 6 | 3 (0) | 5 (0) | 6 (0) | 3 (0) | 11 (0) | 8 (0) | 11 (0) | 13 (0) | 24 (0) | 29 (0) | 46 (0) | 159 (0) | 0.001 | 0.001 | 0.00001 | 0.002 | <0.001* |
| 7 | 604 (0.4) | 634 (0.4) | 693 (0.4) | 674 (0.4) | 964 (0.5) | 896 (0.5) | 997 (0.5) | 978 (0.5) | 957 (0.7) | 1,684 (1.3) | 1,483 (1) | 10,564 (0.6) | <0.001 | 0.08 | 0.03 | 0.12 | <0.001* |
| 8 | 257 (0.2) | 284 (0.2) | 245 (0.1) | 258 (0.2) | 286 (0.1) | 302 (0.2) | 342 (0.2) | 394 (0.2) | 334 (0.2) | 341 (0.3) | 376 (0.3) | 3,419 (0.2) | 0.001 | 0.01 | 0.01 | 0.02 | <0.001* |
| 9 | 153 (0.1) | 123 (0.1) | 125 (0.1) | 97 (0.1) | 127 (0.1) | 89 (0.1) | 97 (0.1) | 89 (0.1) | 55 (0) | 77 (0.1) | 76 (0.1) | 1,108 (0.1) | <0.001 | 0 | -0.01 | 0.002 | 0.01* |
| 10 | 98 (0.1) | 87 (0.1) | 121 (0.1) | 75 (0.1) | 120 (0.1) | 113 (0.1) | 161 (0.1) | 134 (0.1) | 152 (0.1) | 593 (0.5) | 636 (0.5) | 2,290 (0.1) | 0.009 | 0.03 | 0.01 | 0.06 | 0.01* |
| 12 | 2,366 (1.4) | 2,391 (1.4) | 1,941 (1.2) | 1,698 (1.1) | 2,216 (1.1) | 1,715 (1) | 1,748 (0.9) | 1,740 (0.9) | 1,303 (0.9) | 1,105 (0.9) | 1,317 (0.9) | 19,540 (1.1) | <0.001 | -0.05 | -0.07 | -0.03 | <0.001* |
| 13 | 446 (0.3) | 475 (0.3) | 515 (0.3) | 493 (0.3) | 655 (0.3) | 603 (0.3) | 626 (0.3) | 683 (0.4) | 681 (0.5) | 680 (0.5) | 800 (0.6) | 6,657 (0.4) | <0.001 | 0.03 | 0.02 | 0.04 | <0.001* |
| 14 | 689 (0.4) | 590 (0.3) | 603 (0.4) | 530 (0.4) | 597 (0.3) | 623 (0.4) | 557 (0.3) | 617 (0.3) | 650 (0.5) | 885 (0.7) | 1,300 (0.9) | 7,641 (0.4) | 0.045 | 0.04 | 0 | 0.07 | 0.03* |
| 15 | 4,051 (2.4) | 3,696 (2.1) | 3,652 (2.2) | 3,104 (2) | 3,546 (1.8) | 3,216 (1.8) | 3,101 (1.6) | 2,872 (1.5) | 2,582 (1.8) | 2,222 (1.8) | 1,873 (1.3) | 33,915 (1.8) | <0.001 | -0.08 | -0.12 | -0.05 | <0.001* |
| 16 | 2,661 (1.6) | 2,591 (1.5) | 2,809 (1.7) | 2,535 (1.7) | 3,487 (1.7) | 3,013 (1.7) | 3,394 (1.7) | 3,455 (1.8) | 2,748 (1.9) | 2,327 (1.9) | 3,198 (2.3) | 32,218 (1.8) | 0.481 | 0.05 | 0.03 | 0.08 | <0.001* |
| 17 | 13,744 (8.2) | 15,834 (9) | 12,633 (7.5) | 11,893 (7.8) | 16,460 (8.2) | 13,190 (7.3) | 14,364 (7.4) | 14,507 (7.6) | 9,350 (6.6) | 20,927 (16.6) | 18,438 (13) | 161,340 (8.8) | 0.289 | 0.46 | -0.14 | 1.06 | 0.12 |
| 18 | 31 (0) | 43 (0) | 42 (0) | 46 (0) | 70 (0) | 44 (0) | 63 (0) | 66 (0) | 71 (0.1) | 95 (0.1) | 80 (0.1) | 651 (0) | <0.001 | 0.001 | 0.0001 | 0.01 | <0.001* |
| 19 | 1,404 (0.8) | 1,562 (0.9) | 1,738 (1) | 1,789 (1.2) | 2,097 (1) | 2,082 (1.2) | 2,256 (1.2) | 2,673 (1.4) | 1,995 (1.4) | 1,875 (1.5) | 2,324 (1.6) | 21,795 (1.2) | 0.014 | 0.07 | 0.06 | 0.09 | <0.001* |
| 20 | 49,148 (29.4) | 55,542 (31.6) | 51,131 (30.2) | 43,085 (28.4) | 58,093 (28.8) | 43,964 (24.5) | 50,235 (25.7) | 49,164 (25.6) | 26,976 (19.1) | 13,358 (10.6) | 21,991 (15.5) | 462,687 (25.1) | 0.006 | -1.77 | -2.49 | -1.06 | <0.001* |
| 21 | 3,353 (2) | 2,759 (1.6) | 2,969 (1.8) | 2,359 (1.6) | 2,404 (1.2) | 2,140 (1.2) | 2,030 (1) | 1,970 (1) | 1,336 (1) | 1,141 (0.9) | 1,329 (0.9) | 23,790 (1.3) | <0.001 | -0.11 | -0.14 | -0.07 | <0.001* |
| 22 | 789 (0.5) | 678 (0.4) | 666 (0.4) | 632 (0.4) | 650 (0.3) | 699 (0.4) | 733 (0.4) | 702 (0.4) | 578 (0.4) | 517 (0.4) | 522 (0.4) | 7,166 (0.4) | 0.013 | 0 | -0.01 | 0 | 0.31 |
| 23 | 682 (0.4) | 429 (0.2) | 427 (0.3) | 338 (0.2) | 521 (0.3) | 558 (0.3) | 609 (0.3) | 556 (0.3) | 497 (0.4) | 503 (0.4) | 500 (0.4) | 5,620 (0.3) | 0.91 | 0.01 | -0.01 | 0.02 | 0.22 |
| 24 | 15,837 (9.5) | 15,619 (8.9) | 15,801 (9.3) | 14,454 (9.5) | 17,352 (8.6) | 17,092 (9.5) | 18,167 (9.3) | 17,357 (9.1) | 14,160 (10) | 12,172 (9.7) | 13,422 (9.5) | 171,433 (9.3) | 0.236 | 0.04 | -0.04 | 0.13 | 0.25 |
| 25 | 41,823 (25) | 43,572 (24.8) | 44,453 (26.2) | 43,215 (28.5) | 61,032 (30.3) | 62,779 (34.9) | 63,932 (32.8) | 66,644 (34.7) | 55,969 (39.6) | 45,912 (36.5) | 51,397 (36.2) | 580,728 (31.5) | 0.168 | 1.43 | 1.01 | 1.86 | <0.001* |

**Footnote:** Values are presented as annual emergency call counts, with percentages in parentheses indicating the proportion of total emergency calls among individuals aged <18 years in the corresponding year. Mean annual percent change (MAPC) was estimated using linear regression models of annual category-specific proportions over time, with calendar year entered as a continuous independent variable. “P for Trend (Number)” represents the statistical significance of trends in absolute annual emergency call counts, whereas “P for Trend (Percentage)” reflects trends in annual category-specific proportions relative to total calls in the same age group. Statistically significant trends are indicated by an asterisk (*), defined as p < 0.05. CBD = Criteria-Based Dispatch; CI = confidence interval. CBD categories represent symptom-based dispatch classifications assigned during emergency telephone triage and do not necessarily reflect final confirmed clinical diagnoses. Records with missing age-group data were excluded from this subgroup analysis.

**Supplementary Material Table 3.** Distribution of Total Emergency Calls by CBD Category among Individuals Aged 18-59 Years from 2012 to 2022 with Long-term Trend Analyses.

| **Age**  **18-59** | **2012** | **2013** | **2014** | **2015** | **2016** | **2017** | **2018** | **2019** | **2020** | **2021** | **2022** | **Total** | **P for Trend (Number)** | **Mean Annual Percent Change (%)** | **95%CI (%)** | | **P for Trend (Percentage)** |
| --- | --- | --- | --- | --- | --- | --- | --- | --- | --- | --- | --- | --- | --- | --- | --- | --- | --- |
| **Total Calls** | 289,956 (6) | 317,964 (6.6) | 341,533 (7.1) | 329,932 (6.9) | 444,279 (9.2) | 462,657 (9.6) | 516,873 (10.7) | 550,388 (11.4) | 514,494 (10.7) | 504,310 (10.5) | 546,861 (11.4) | 7,320,875 | 0.001 |  | | | |
| **CBD Category** | | | | | | | | | | | | | | | | | |
| 1 | 65,353 (12.2) | 68,510 (12.4) | 68,251 (12) | 61,713 (11.6) | 76,958 (11.2) | 73,279 (10.6) | 80,149 (10.6) | 79,432 (10.1) | 72,509 (10) | 61,797 (8) | 62,756 (8.9) | 770,707 (10.5) | 0.882 | -0.4 | -0.5 | -0.3 | <0.001* |
| 2 | 2,763 (0.5) | 2,664 (0.5) | 3,182 (0.6) | 3,082 (0.6) | 4,219 (0.6) | 4,598 (0.7) | 5,794 (0.8) | 5,132 (0.7) | 5,689 (0.8) | 6,160 (0.8) | 5,493 (0.8) | 48,776 (0.7) | <0.001 | 0.03 | 0.02 | 0.04 | <0.001* |
| 3 | 5,919 (1.1) | 5,666 (1) | 6,409 (1.1) | 5,230 (1) | 6,624 (1) | 6,858 (1) | 7,701 (1) | 6,240 (0.8) | 5,627 (0.8) | 5,145 (0.7) | 5,186 (0.7) | 66,605 (0.9) | 0.581 | -0.04 | -0.06 | -0.03 | <0.001* |
| 4 | 6,994 (1.3) | 6,891 (1.3) | 7,318 (1.3) | 6,870 (1.3) | 8,784 (1.3) | 9,203 (1.3) | 10,213 (1.4) | 10,426 (1.3) | 9,977 (1.4) | 10,409 (1.3) | 9,894 (1.4) | 96,979 (1.3) | <0.001 | 0.01 | 0.01 | 0.02 | <0.001* |
| 5 | 25,811 (4.8) | 26,564 (4.8) | 28,853 (5.1) | 27,157 (5.1) | 36,605 (5.3) | 38,051 (5.5) | 41,521 (5.5) | 42,546 (5.4) | 41,397 (5.7) | 56,383 (7.3) | 44,464 (6.3) | 409,352 (5.6) | <0.001 | 0.18 | 0.09 | 0.27 | <0.001* |
| 6 | 174 (0) | 144 (0) | 207 (0) | 200 (0) | 320 (0.1) | 347 (0.1) | 475 (0.1) | 826 (0.1) | 992 (0.1) | 1,227 (0.2) | 1,422 (0.2) | 6,334 (0.1) | <0.001 | 0.02 | 0.01 | 0.02 | <0.001* |
| 7 | 10,521 (2) | 11,018 (2) | 11,793 (2.1) | 12,262 (2.3) | 15,856 (2.3) | 16,936 (2.5) | 19,548 (2.6) | 20,557 (2.6) | 20,849 (2.9) | 23,267 (3) | 20,837 (3) | 183,444 (2.5) | <0.001 | 0.11 | 0.1 | 0.12 | <0.001* |
| 8 | 257 (0.1) | 194 (0) | 221 (0) | 228 (0) | 302 (0) | 329 (0.1) | 336 (0) | 410 (0.1) | 449 (0.1) | 448 (0.1) | 513 (0.1) | 3,687 (0.1) | <0.001 | 0.001 | 0.0001 | 0.002 | <0.001* |
| 9 | 9,154 (1.7) | 9,002 (1.6) | 8,544 (1.5) | 7,394 (1.4) | 9,024 (1.3) | 8,081 (1.2) | 8,560 (1.1) | 8,960 (1.1) | 8,480 (1.2) | 7,972 (1) | 7,628 (1.1) | 92,799 (1.3) | 0.146 | -0.07 | -0.08 | -0.05 | <0.001* |
| 10 | 268 (0.1) | 208 (0) | 265 (0.1) | 237 (0) | 243 (0) | 256 (0) | 343 (0.1) | 238 (0) | 1,380 (0.2) | 4,250 (0.6) | 1,853 (0.3) | 9,541 (0.1) | 0.026 | 0.03 | 0 | 0.06 | 0.03* |
| 12 | 15,812 (3) | 16,253 (3) | 15,481 (2.7) | 14,280 (2.7) | 17,987 (2.6) | 18,127 (2.6) | 19,006 (2.5) | 19,598 (2.5) | 17,482 (2.4) | 15,858 (2) | 14,761 (2.1) | 184,645 (2.5) | 0.584 | -0.09 | -0.11 | -0.07 | <0.001* |
| 13 | 8,117 (1.5) | 8,000 (1.5) | 8,572 (1.5) | 8,435 (1.6) | 10,809 (1.6) | 11,383 (1.7) | 12,943 (1.7) | 13,570 (1.7) | 14,270 (2) | 14,971 (1.9) | 14,209 (2) | 125,279 (1.7) | <0.001 | 0.06 | 0.04 | 0.07 | <0.001* |
| 14 | 3,986 (0.7) | 3,684 (0.7) | 3,443 (0.6) | 3,105 (0.6) | 4,015 (0.6) | 4,123 (0.6) | 4,357 (0.6) | 4,651 (0.6) | 5,052 (0.7) | 4,595 (0.6) | 5,183 (0.7) | 46,194 (0.6) | 0.001 | 0.001 | -0.02 | 0.01 | 0.9 |
| 15 | 27,910 (5.2) | 25,748 (4.7) | 25,522 (4.5) | 21,737 (4.1) | 26,588 (3.9) | 25,486 (3.7) | 26,176 (3.5) | 24,639 (3.1) | 24,071 (3.3) | 20,630 (2.7) | 18,480 (2.6) | 266,987 (3.7) | 0.015 | -0.24 | -0.28 | -0.21 | <0.001* |
| 16 | 16,472 (3.1) | 17,919 (3.3) | 19,642 (3.5) | 19,538 (3.7) | 26,580 (3.9) | 28,315 (4.1) | 31,867 (4.2) | 34,540 (4.4) | 33,024 (4.5) | 33,530 (4.3) | 32,477 (4.6) | 293,904 (4) | <0.001 | 0.15 | 0.12 | 0.18 | <0.001* |
| 17 | 77,369 (14.5) | 85,117 (15.4) | 89,285 (15.7) | 86,187 (16.2) | 113,665 (16.5) | 111,166 (16.1) | 119,918 (15.9) | 126,955 (16.1) | 111,474 (15.3) | 178,102 (22.9) | 129,878 (18.4) | 1,229,116 (16.8) | 0.001 | 0.43 | 0.03 | 0.84 | 0.04* |
| 18 | 2,002 (0.4) | 2,250 (0.4) | 2,793 (0.5) | 3,030 (0.6) | 4,252 (0.6) | 4,884 (0.7) | 6,053 (0.8) | 7,410 (0.9) | 7,731 (1.1) | 8,344 (1.1) | 8,124 (1.2) | 56,873 (0.8) | <0.001 | 0.08 | 0.08 | 0.09 | <0.001* |
| 19 | 14,780 (2.8) | 15,718 (2.9) | 17,286 (3) | 17,527 (3.3) | 23,992 (3.5) | 24,678 (3.6) | 27,634 (3.7) | 31,217 (4) | 28,044 (3.9) | 27,405 (3.5) | 27,539 (3.9) | 255,820 (3.5) | <0.001 | 0.11 | 0.07 | 0.15 | <0.001* |
| 20 | 738 (0.1) | 724 (0.1) | 420 (0.1) | 309 (0.1) | 402 (0.1) | 278 (0) | 343 (0.1) | 278 (0) | 178 (0) | 89 (0) | 136 (0) | 3,895 (0.1) | <0.001 | -0.01 | -0.02 | -0.01 | <0.001* |
| 21 | 20,859 (3.9) | 19,541 (3.5) | 19,997 (3.5) | 17,284 (3.3) | 18,926 (2.7) | 17,779 (2.6) | 18,653 (2.5) | 18,645 (2.4) | 16,590 (2.3) | 14,892 (1.9) | 14,770 (2.1) | 197,936 (2.7) | 0.001 | -0.19 | -0.23 | -0.16 | <0.001* |
| 22 | 1,677 (0.3) | 1,813 (0.3) | 1,812 (0.3) | 1,666 (0.3) | 2,130 (0.3) | 2,135 (0.3) | 2,361 (0.3) | 2,262 (0.3) | 2,479 (0.3) | 2,151 (0.3) | 2,121 (0.3) | 22,607 (0.3) | 0.006 | 0.001 | -0.01 | 0 | 0.19 |
| 23 | 1,197 (0.2) | 509 (0.1) | 557 (0.1) | 499 (0.1) | 736 (0.1) | 792 (0.1) | 788 (0.1) | 879 (0.1) | 725 (0.1) | 662 (0.1) | 716 (0.1) | 8,060 (0.1) | 0.83 | -0.01 | -0.01 | 0 | 0.14 |
| 24 | 39,583 (7.4) | 40,815 (7.4) | 43,096 (7.6) | 40,571 (7.6) | 52,208 (7.6) | 53,444 (7.7) | 58,661 (7.8) | 60,890 (7.7) | 57,298 (7.9) | 55,110 (7.1) | 54,275 (7.7) | 555,951 (7.6) | 0.001 | 0.01 | -0.04 | 0.06 | 0.56 |
| 25 | 177,488 (33.2) | 182,283 (33.1) | 185,493 (32.6) | 173,026 (32.6) | 228,865 (33.2) | 230,098 (33.3) | 250,123 (33.2) | 269,722 (34.1) | 240,903 (33.2) | 224,275 (28.8) | 223,108 (31.6) | 2,385,384 (32.6) | 0.012 | -0.18 | -0.47 | 0.11 | 0.19 |

**Footnote:** Values are presented as annual emergency call counts, with percentages in parentheses indicating the proportion of total emergency calls among individuals aged 18–59 years in the corresponding year. Mean annual percent change (MAPC) was estimated using linear regression models of annual category-specific proportions over time, with calendar year entered as a continuous independent variable. “P for Trend (Number)” represents the statistical significance of trends in absolute annual emergency call counts, whereas “P for Trend (Percentage)” reflects trends in annual category-specific proportions relative to total calls in the same age group. Statistically significant trends are indicated by an asterisk (*), defined as p < 0.05. CBD = Criteria-Based Dispatch; CI = confidence interval. CBD categories represent symptom-based dispatch classifications assigned during emergency telephone triage and do not necessarily reflect final confirmed clinical diagnoses. Records with missing age-group data were excluded from this subgroup analysis.

**Supplementary Material Table 4.** Distribution of Total Emergency Calls by CBD Category among Individuals Aged ≥ 60 Years from 2012 to 2022 with Long-term Trend Analyses.

| **Age**  **≥ 60** | **2012** | **2013** | **2014** | **2015** | **2016** | **2017** | **2018** | **2019** | **2020** | **2021** | **2022** | **Total** | **P for Trend (Number)** | **Mean Annual Percent Change (%)** | **95%CI (%)** | | **P for Trend (Percentage)** |
| --- | --- | --- | --- | --- | --- | --- | --- | --- | --- | --- | --- | --- | --- | --- | --- | --- | --- |
| **Total Calls** | 289,956 (6) | 317,964 (6.6) | 341,533 (7.1) | 329,932 (6.9) | 444,279 (9.2) | 462,657 (9.6) | 516,873 (10.7) | 550,388 (11.4) | 514,494 (10.7) | 504,310 (10.5) | 546,861 (11.4) | 4,819,247 | <0.001 |  | | | |
| **CBD Category** | | | | | | | | | | | | | | | | | |
| 1 | 44,552 (15.4) | 48,044 (15.1) | 50,168 (14.7) | 46,836 (14.2) | 60,780 (13.7) | 59,880 (12.9) | 65,085 (12.6) | 67,180 (12.2) | 61,257 (11.9) | 53,044 (10.5) | 56,664 (10.4) | 613,490 (12.7) | 0.041 | -0.52 | -0.57 | -0.46 | <0.001* |
| 2 | 971 (0.3) | 1,004 (0.3) | 1,195 (0.4) | 1,178 (0.4) | 1,560 (0.4) | 1,755 (0.4) | 2,128 (0.4) | 2,049 (0.4) | 2,003 (0.4) | 2,097 (0.4) | 2,140 (0.4) | 18,080 (0.4) | <0.001 | 0.01 | 0 | 0.01 | <0.001* |
| 3 | 2,258 (0.8) | 2,336 (0.7) | 2,627 (0.8) | 2,314 (0.7) | 2,990 (0.7) | 3,293 (0.7) | 3,958 (0.8) | 2,979 (0.5) | 2,672 (0.5) | 2,444 (0.5) | 2,706 (0.5) | 30,577 (0.6) | 0.365 | -0.03 | -0.04 | -0.02 | <0.001* |
| 4 | 4,947 (1.7) | 4,895 (1.5) | 5,471 (1.6) | 4,932 (1.5) | 6,610 (1.5) | 7,147 (1.5) | 8,423 (1.6) | 8,596 (1.6) | 8,999 (1.8) | 9,266 (1.8) | 9,646 (1.8) | 78,932 (1.6) | <0.001 | 0.02 | 0 | 0.04 | 0.07 |
| 5 | 37,628 (13) | 40,729 (12.8) | 44,601 (13.1) | 42,808 (13) | 57,601 (13) | 62,376 (13.5) | 69,774 (13.5) | 72,406 (13.2) | 67,988 (13.2) | 70,588 (14) | 77,244 (14.1) | 643,743 (13.4) | <0.001 | 0.11 | 0.05 | 0.16 | <0.001* |
| 6 | 186 (0.1) | 215 (0.1) | 232 (0.1) | 263 (0.1) | 401 (0.1) | 397 (0.1) | 594 (0.1) | 1,018 (0.2) | 1,218 (0.2) | 1,591 (0.3) | 1,932 (0.4) | 8,047 (0.2) | <0.001 | 0.03 | 0.02 | 0.04 | <0.001* |
| 7 | 10,443 (3.6) | 11,258 (3.5) | 11,915 (3.5) | 11,872 (3.6) | 16,152 (3.6) | 16,920 (3.7) | 19,782 (3.8) | 20,714 (3.8) | 20,365 (4) | 20,438 (4.1) | 20,608 (3.8) | 180,467 (3.7) | <0.001 | 0.04 | 0.02 | 0.07 | <0.001* |
| 8 | 553 (0.2) | 557 (0.2) | 607 (0.2) | 623 (0.2) | 889 (0.2) | 1,042 (0.2) | 1,060 (0.2) | 1,240 (0.2) | 1,297 (0.3) | 1,414 (0.3) | 1,535 (0.3) | 10,817 (0.2) | <0.001 | 0.01 | 0.01 | 0.01 | <0.001* |
| 9 | 17,344 (6) | 17,284 (5.4) | 17,099 (5) | 15,088 (4.6) | 19,005 (4.3) | 17,213 (3.7) | 18,118 (3.5) | 18,904 (3.4) | 18,595 (3.6) | 17,113 (3.4) | 18,404 (3.4) | 194,167 (4) | 0.193 | -0.26 | -0.33 | -0.18 | <0.001* |
| 10 | 74 (0) | 53 (0) | 76 (0) | 70 (0) | 69 (0) | 75 (0) | 122 (0) | 96 (0) | 131 (0) | 524 (0.1) | 1,167 (0.2) | 2,457 (0.1) | 0.023 | 0.01 | 0 | 0.02 | 0.03* |
| 12 | 12,979 (4.5) | 14,224 (4.5) | 14,139 (4.1) | 13,161 (4) | 17,539 (4) | 18,966 (4.1) | 20,964 (4.1) | 22,088 (4) | 19,664 (3.8) | 17,185 (3.4) | 17,663 (3.2) | 188,572 (3.9) | 0.017 | -0.1 | -0.14 | -0.06 | <0.001* |
| 13 | 813 (0.3) | 879 (0.3) | 973 (0.3) | 992 (0.3) | 1,255 (0.3) | 1,392 (0.3) | 1,563 (0.3) | 1,510 (0.3) | 1,608 (0.3) | 1,528 (0.3) | 1,634 (0.3) | 14,147 (0.3) | <0.001 | 0 | 0 | 0 | 0.06 |
| 14 | 560 (0.2) | 522 (0.2) | 546 (0.2) | 592 (0.2) | 752 (0.2) | 708 (0.2) | 831 (0.2) | 878 (0.2) | 892 (0.2) | 775 (0.2) | 889 (0.2) | 7,945 (0.2) | <0.001 | 0 | 0 | 0 | 0.11 |
| 15 | 184 (0.1) | 163 (0.1) | 248 (0.1) | 202 (0.1) | 185 (0) | 203 (0) | 219 (0) | 217 (0) | 196 (0) | 213 (0) | 189 (0) | 2,219 (0.1) | 0.561 | 0.001 | 0.0001 | 0.002 | <0.001* |
| 16 | 4,842 (1.7) | 5,537 (1.7) | 5,997 (1.8) | 5,982 (1.8) | 8,266 (1.9) | 8,688 (1.9) | 10,187 (2) | 11,308 (2.1) | 11,502 (2.2) | 12,115 (2.4) | 12,379 (2.3) | 96,803 (2) | <0.001 | 0.07 | 0.05 | 0.09 | <0.001* |
| 17 | 93,833 (32.4) | 105,993 (33.3) | 115,714 (33.9) | 113,590 (34.4) | 153,681 (34.6) | 157,959 (34.1) | 172,808 (33.4) | 183,388 (33.3) | 164,199 (31.9) | 162,810 (32.3) | 181,988 (33.3) | 1,605,963 (33.3) | <0.001 | -0.08 | -0.27 | 0.11 | 0.36 |
| 18 | 3,403 (1.2) | 3,622 (1.1) | 4,347 (1.3) | 4,789 (1.5) | 6,859 (1.5) | 8,118 (1.8) | 9,706 (1.9) | 11,370 (2.1) | 12,345 (2.4) | 12,675 (2.5) | 13,121 (2.4) | 90,355 (1.9) | <0.001 | 0.15 | 0.13 | 0.17 | <0.001* |
| 19 | 13,333 (4.6) | 15,176 (4.8) | 16,623 (4.9) | 16,846 (5.1) | 23,936 (5.4) | 25,478 (5.5) | 29,851 (5.8) | 34,187 (6.2) | 33,029 (6.4) | 33,714 (6.7) | 36,513 (6.7) | 278,686 (5.8) | <0.001 | 0.23 | 0.21 | 0.25 | <0.001* |
| 20 | 544 (0.2) | 552 (0.2) | 284 (0.1) | 198 (0.1) | 262 (0.1) | 174 (0) | 192 (0) | 146 (0) | 79 (0) | 60 (0) | 52 (0) | 2,543 (0.1) | <0.001 | -0.02 | -0.02 | -0.01 | <0.001* |
| 21 | 1,438 (0.5) | 1,221 (0.4) | 1,415 (0.4) | 1,273 (0.4) | 1,521 (0.3) | 1,653 (0.4) | 1,903 (0.4) | 1,842 (0.3) | 1,860 (0.4) | 1,840 (0.4) | 1,870 (0.3) | 17,836 (0.4) | <0.001 | -0.01 | -0.02 | 0 | 0.01* |
| 22 | 339 (0.1) | 364 (0.1) | 416 (0.1) | 362 (0.1) | 525 (0.1) | 525 (0.1) | 580 (0.1) | 632 (0.1) | 581 (0.1) | 538 (0.1) | 551 (0.1) | 5,413 (0.1) | 0.001 | 0.001 | 0.0001 | 0.002 | 0.01* |
| 23 | 222 (0.1) | 118 (0) | 119 (0) | 87 (0) | 131 (0) | 185 (0) | 201 (0) | 230 (0) | 186 (0) | 200 (0) | 220 (0) | 1,899 (0) | 0.094 | 0 | 0 | 0 | 0.38 |
| 24 | 20,840 (7.2) | 23,675 (7.5) | 25,283 (7.4) | 24,935 (7.6) | 34,106 (7.7) | 37,400 (8.1) | 42,611 (8.2) | 46,568 (8.5) | 45,331 (8.8) | 45,103 (8.9) | 49,072 (9) | 394,924 (8.2) | <0.001 | 0.2 | 0.17 | 0.22 | <0.001* |
| 25 | 17,670 (6.1) | 19,543 (6.2) | 21,438 (6.3) | 20,939 (6.4) | 29,204 (6.6) | 31,110 (6.7) | 36,213 (7) | 40,842 (7.4) | 38,497 (7.5) | 37,035 (7.3) | 38,674 (7.1) | 331,165 (6.9) | <0.001 | 0.14 | 0.1 | 0.19 | <0.001* |

**Footnote:** Values are presented as annual emergency call counts, with percentages in parentheses indicating the proportion of total emergency calls among individuals aged ≥60 years in the corresponding year. Mean annual percent change (MAPC) was estimated using linear regression models of annual category-specific proportions over time, with calendar year entered as a continuous independent variable. “P for Trend (Number)” represents the statistical significance of trends in absolute annual emergency call counts, whereas “P for Trend (Percentage)” reflects trends in annual category-specific proportions relative to total calls in the same age group. Statistically significant trends are indicated by an asterisk (*), defined as p < 0.05. CBD = Criteria-Based Dispatch; CI = confidence interval. CBD categories represent symptom-based dispatch classifications assigned during emergency telephone triage and do not necessarily reflect final confirmed clinical diagnoses. Records with missing age-group data were excluded from this subgroup analysis.

**Supplementary Material Table 5.**Total Number of Emergency Calls by CBD Category from 2012–2022, Stratified by Geographic Region.

| **CBD Category** | **Central** | **North** | **Northeast** | **Eastern** | **Western** | **South** |
| --- | --- | --- | --- | --- | --- | --- |
| 1 | 178,293 (6) | 129,541 (8.7) | 1,005,336 (14.6) | 57,533 (5.9) | 39,027 (7.2) | 166,969 (8.8) |
| 2 | 10,545 (0.4) | 12,404 (0.8) | 47,497 (0.7) | 3958 (0.4) | 3,341 (0.6) | 10,721 (0.6) |
| 3 | 15,029 (0.5) | 9,528 (0.6) | 76,728 (1.1) | 6365 (0.7) | 4,758 (0.9) | 18,286 (1) |
| 4 | 44,209 (1.5) | 23,335 (1.6) | 89,739 (1.3) | 12,109 (1.3) | 7,878 (1.4) | 16,845 (0.9) |
| 5 | 316,131 (10.7) | 140,376 (9.4) | 449,024 (6.5) | 74,977 (7.7) | 52,163 (9.6) | 169,413 (8.9) |
| 6 | 18,730 (0.6) | 2,014 (0.1) | 4,171 (0.1) | 2,129 (0.2) | 624 (0.1) | 2,937 (0.2) |
| 7 | 67,372 (2.3) | 69,150 (4.6) | 151485 (2.2) | 19,469 (2) | 15931 (2.9) | 67,999 (3.6) |
| 8 | 3,883 (0.1) | 3,005 (0.2) | 8,804 (0.1) | 885 (0.1) | 617 (0.1) | 2,278 (0.1) |
| 9 | 64,388 (2.2) | 20,413 (1.4) | 170,626 (2.5) | 13,474 (1.4) | 10,821 (2) | 23,398 (1.2) |
| 10 | 2,419 (0.1) | 476 (0) | 10,873 (0.2) | 248 (0) | 417 (0.1) | 245 (0) |
| 12 | 56,004 (1.9) | 38,279 (2.6) | 238,782 (3.5) | 9,908 (1) | 8,307 (1.5) | 44,960 (2.4) |
| 13 | 18,070 (0.6) | 18,399 (1.2) | 84,934 (1.2) | 7,065 (0.7) | 4,610 (0.8) | 15,252 (0.8) |
| 14 | 16,871 (0.6) | 8,695 (0.6) | 23,626 (0.3) | 5,756 (0.6) | 3,626 (0.7) | 8,056 (0.4) |
| 15 | 43,444 (1.5) | 16,207 (1.1) | 150,575 (2.2) | 18,356 (1.9) | 10,718 (2) | 76,158 (4) |
| 16 | 114,122 (3.9) | 58,244 (3.9) | 187,330 (2.7) | 33,660 (3.5) | 18,408 (3.4) | 50,755 (2.7) |
| 17 | 594,377 (20.1) | 249,136 (16.7) | 1,734,890 (25.2) | 130,697 (13.5) | 95,332 (17.5) | 363,703 (19.1) |
| 18 | 44,365 (1.5) | 13,541 (0.9) | 60,084 (0.9) | 11,169 (1.2) | 7,538 (1.4) | 24,650 (1.3) |
| 19 | 171,473 (5.8) | 91,236 (6.1) | 204,659 (3) | 38,812 (4) | 24,863 (4.6) | 94,087 (4.9) |
| 20 | 25,706 (0.9) | 14,768 (1) | 373,256 (5.4) | 6709 (0.7) | 5,515 (1) | 47,105 (2.5) |
| 21 | 63,407 (2.1) | 23,584 (1.6) | 109,261 (1.6) | 24,499 (2.5) | 10,704 (2) | 29,095 (1.5) |
| 22 | 8,047 (0.3) | 3,143 (0.2) | 17,184 (0.3) | 2,920 (0.3) | 1,480 (0.3) | 5,070 (0.3) |
| 23 | 2,679 (0.1) | 986 (0.1) | 7,044 (0.1) | 1,814 (0.2) | 728 (0.1) | 3,271 (0.2) |
| 24 | 231,623 (7.8) | 143,352 (9.6) | 556,525 (8.1) | 68,365 (7.1) | 43,300 (7.9) | 148,557 (7.8) |
| 25 | 847,264 (28.6) | 404,110 (27.1) | 1,123,395 (16.3) | 418,553 (43.2) | 175,440 (32.1) | 514,828 (27) |
| Total | 2,958,481 (20.0) | 1,493,922(10.1) | 6,885,828 (46.7) | 969,430 (6.6) | 546,146 (3.7) | 1,904,638(12.9) |

**Footnote:** Values are presented as number of emergency calls, with percentages in parentheses indicating the proportion within each geographic region analysis dataset from 2012 to 2022. Geographic regions were classified according to Thailand’s standard six-region administrative classification used in national health system analyses(11). CBD = Criteria-Based Dispatch. CBD categories represent symptom-based dispatch classifications assigned during emergency telephone triage and do not necessarily reflect final confirmed clinical diagnoses. Records with missing geographic region data were excluded from this subgroup analysis.

**Supplementary Material Table 6.** Distribution of Total Emergency Calls by CBD Category in the Central Region from 2012 to 2022 with Long-term Trend Analyses.

| **Central** | **2012** | **2013** | **2014** | **2015** | **2016** | **2017** | **2018** | **2019** | **2020** | **2021** | **2022** | **Total** | **P for Trend (Number)** | **Mean Annual Percent Change (%)** | **95%CI (%)** | | **P for Trend (Percentage)** |
| --- | --- | --- | --- | --- | --- | --- | --- | --- | --- | --- | --- | --- | --- | --- | --- | --- | --- |
| **Total Calls** | 183,657 (6.2) | 188,577 (6.4) | 197,473 (6.7) | 197,977 (6.7) | 269,041 (9.1) | 259,188 (8.7) | 292,130 (9.9) | 335,459 (11.3) | 330,741 (11.2) | 365,878 (12.3) | 343,797 (11.6) | 2,963,918 | <0.001 |  | | | |
| **CBD Category** | | | | | | | | | | | | | | | | | |
| 1 | 11,712 (6.4) | 12,944 (6.9) | 13,344 (6.8) | 12,680 (6.4) | 16,753 (6.2) | 16,930 (6.5) | 19,223 (6.6) | 20,365 (6.1) | 20,471 (6.2) | 16,511 (4.5) | 17,360 (5.1) | 178,293 (6) | 0.004 | -0.16 | -0.27 | -0.05 | 0.01* |
| 2 | 535 (0.3) | 471 (0.3) | 594 (0.3) | 586 (0.3) | 919 (0.3) | 971 (0.4) | 1,133 (0.4) | 1,238 (0.4) | 1,330 (0.4) | 1,332 (0.4) | 1,436 (0.4) | 10,545 (0.4) | <0.001 | 0.01 | 0.01 | 0.02 | <0.001* |
| 3 | 1,352 (0.7) | 1,225 (0.7) | 1,343 (0.7) | 1,160 (0.6) | 1,519 (0.6) | 1,475 (0.6) | 1,714 (0.6) | 1,494 (0.5) | 1,362 (0.4) | 1,177 (0.3) | 1,208 (0.4) | 15,029 (0.5) | 0.997 | -0.04 | -0.05 | -0.03 | <0.001* |
| 4 | 2,444 (1.3) | 2,536 (1.3) | 2,872 (1.5) | 2,981 (1.5) | 3,789 (1.4) | 3,845 (1.5) | 4,597 (1.6) | 5,224 (1.6) | 5,301 (1.6) | 5,166 (1.4) | 5,454 (1.6) | 44,209 (1.5) | <0.001 | 0.02 | 0.01 | 0.04 | 0.01* |
| 5 | 16,229 (8.8) | 17,641 (9.4) | 19,490 (9.9) | 19,246 (9.7) | 26,191 (9.7) | 26,265 (10.1) | 30,441 (10.4) | 34,385 (10.3) | 34,569 (10.5) | 49,885 (13.6) | 41,789 (12.4) | 316,131 (10.7) | <0.001 | 0.35 | 0.17 | 0.52 | <0.001* |
| 6 | 485 (0.3) | 478 (0.3) | 537 (0.3) | 722 (0.4) | 1,201 (0.5) | 1,131 (0.4) | 1,576 (0.5) | 2,614 (0.8) | 3,404 (1) | 2,989 (0.8) | 3,593 (1.1) | 18,730 (0.6) | <0.001 | 0.09 | 0.06 | 0.11 | <0.001* |
| 7 | 3,858 (2.1) | 3,945 (2.1) | 4,245 (2.2) | 4,056 (2.1) | 5,884 (2.2) | 6,503 (2.5) | 7,165 (2.5) | 7,866 (2.3) | 8,303 (2.5) | 7,848 (2.2) | 7,699 (2.3) | 67,372 (2.3) | <0.001 | 0.03 | -0.01 | 0.06 | 0.09 |
| 8 | 247 (0.1) | 186 (0.1) | 231 (0.1) | 249 (0.1) | 324 (0.1) | 409 (0.2) | 374 (0.1) | 423 (0.1) | 489 (0.2) | 449 (0.1) | 502 (0.2) | 3,883 (0.1) | <0.001 | 0 | 0 | 0.01 | 0.13 |
| 9 | 5,059 (2.8) | 5,272 (2.8) | 5,501 (2.8) | 4,809 (2.4) | 6,042 (2.3) | 5,587 (2.2) | 6,345 (2.2) | 7,123 (2.1) | 6,721 (2) | 5,851 (1.6) | 6,078 (1.8) | 64,388 (2.2) | 0.02 | -0.11 | -0.14 | -0.09 | <0.001* |
| 10 | 99 (0.1) | 48 (0) | 59 (0) | 89 (0) | 78 (0) | 68 (0) | 68 (0) | 103 (0) | 1,326 (0.4) | 407 (0.1) | 74 (0) | 2,419 (0.1) | 0.215 | 0.01 | -0.01 | 0.04 | 0.31 |
| 12 | 3,543 (1.9) | 3,838 (2) | 3,767 (1.9) | 3,768 (1.9) | 5,272 (2) | 5,678 (2.2) | 6,270 (2.2) | 6,807 (2) | 6,203 (1.9) | 5,394 (1.5) | 5,464 (1.6) | 56,004 (1.9) | 0.005 | -0.03 | -0.07 | 0.01 | 0.12 |
| 13 | 1,210 (0.7) | 1,125 (0.6) | 1,142 (0.6) | 1,184 (0.6) | 1,589 (0.6) | 1,678 (0.7) | 1,896 (0.7) | 1,821 (0.5) | 2,135 (0.7) | 2,104 (0.6) | 2,186 (0.7) | 18,070 (0.6) | <0.001 | 0 | -0.01 | 0.01 | 1 |
| 14 | 1,266 (0.7) | 1,260 (0.7) | 1,145 (0.6) | 1,141 (0.6) | 1,449 (0.5) | 1,436 (0.6) | 1,550 (0.5) | 1,815 (0.5) | 2,030 (0.6) | 1,713 (0.5) | 2,066 (0.6) | 16,871 (0.6) | <0.001 | -0.01 | -0.02 | 0 | 0.08 |
| 15 | 3,290 (1.8) | 3,263 (1.7) | 3,373 (1.7) | 3,167 (1.6) | 4,153 (1.5) | 4,087 (1.6) | 4,475 (1.5) | 4,438 (1.3) | 5,168 (1.6) | 4,232 (1.2) | 3,798 (1.1) | 43,444 (1.5) | 0.017 | -0.06 | -0.08 | -0.04 | <0.001* |
| 16 | 6,308 (3.4) | 6,849 (3.6) | 7,462 (3.8) | 8,001 (4) | 11,061 (4.1) | 10,566 (4.1) | 12,025 (4.1) | 13,454 (4) | 13,358 (4) | 12,103 (3.3) | 12,935 (3.8) | 114,122 (3.9) | <0.001 | 0.01 | -0.05 | 0.08 | 0.67 |
| 17 | 31,635 (17.2) | 32,910 (17.5) | 36,376 (18.4) | 37,129 (18.8) | 50,387 (18.7) | 47,381 (18.3) | 53,652 (18.4) | 61,551 (18.4) | 59,346 (17.9) | 109,382 (29.9) | 74,627 (22.1) | 594,376 (20.1) | 0.001 | 0.65 | -0.02 | 1.32 | 0.06 |
| 18 | 1,691 (0.9) | 1,968 (1) | 2,279 (1.2) | 2,548 (1.3) | 3,339 (1.2) | 3,530 (1.4) | 4,498 (1.5) | 5,816 (1.7) | 6,140 (1.9) | 5,931 (1.6) | 6,625 (2) | 44,365 (1.5) | <0.001 | 0.1 | 0.08 | 0.12 | <0.001* |
| 19 | 9,018 (4.9) | 10,002 (5.3) | 10,453 (5.3) | 11,096 (5.6) | 14,847 (5.5) | 14,526 (5.6) | 16,765 (5.7) | 21,094 (6.3) | 20,766 (6.3) | 20,517 (5.6) | 22,389 (6.6) | 171,473 (5.8) | <0.001 | 0.13 | 0.07 | 0.19 | <0.001* |
| 20 | 2,740 (1.5) | 2,254 (1.2) | 2,370 (1.2) | 2,147 (1.1) | 2,959 (1.1) | 2,241 (0.9) | 3,016 (1) | 3,106 (0.9) | 1,857 (0.6) | 1,034 (0.3) | 1,982 (0.6) | 25,706 (0.9) | 0.213 | -0.1 | -0.13 | -0.06 | <0.001* |
| 21 | 6,535 (3.6) | 6,068 (3.2) | 5,973 (3) | 5,651 (2.9) | 6,067 (2.3) | 4,895 (1.9) | 5,283 (1.8) | 6,273 (1.9) | 6,177 (1.9) | 4,973 (1.4) | 5,512 (1.6) | 63,407 (2.1) | 0.146 | -0.21 | -0.26 | -0.15 | <0.001* |
| 22 | 622 (0.3) | 609 (0.3) | 610 (0.3) | 557 (0.3) | 773 (0.3) | 778 (0.3) | 753 (0.3) | 842 (0.3) | 961 (0.3) | 746 (0.2) | 796 (0.2) | 8,047 (0.3) | 0.007 | -0.01 | -0.01 | -0.01 | <0.001* |
| 23 | 183 (0.1) | 187 (0.1) | 184 (0.1) | 191 (0.1) | 253 (0.1) | 246 (0.1) | 261 (0.1) | 315 (0.1) | 291 (0.1) | 257 (0.1) | 311 (0.1) | 2,679 (0.1) | 0.001 | 0 | 0 | 0 | 0.02* |
| 24 | 14,004 (7.6) | 14,537 (7.7) | 15,258 (7.7) | 15,506 (7.8) | 21,050 (7.8) | 21,022 (8.1) | 23,960 (8.2) | 27,216 (8.1) | 27,485 (8.3) | 24,398 (6.7) | 27,187 (8) | 231,623 (7.8) | <0.001 | 0.01 | -0.1 | 0.11 | 0.91 |
| 25 | 59,592 (32.5) | 58,961 (31.3) | 58,865 (29.8) | 59,313 (30) | 83,142 (30.9) | 77,940 (30.1) | 85,090 (29.1) | 100,076 (29.8) | 95,544 (28.9) | 81,454 (22.3) | 87,286 (25.8) | 847,263 (28.6) | 0.002 | -0.67 | -1.06 | -0.28 | <0.001* |

**Footnote:** Values are presented as annual emergency call counts, with percentages in parentheses indicating the proportion of total emergency calls in the Central region in the corresponding year. Mean annual percent change (MAPC) was estimated using linear regression models of annual category-specific proportions over time, with calendar year entered as a continuous independent variable. “P for Trend (Number)” represents the statistical significance of trends in absolute annual emergency call counts, whereas “P for Trend (Percentage)” reflects trends in annual category-specific proportions relative to total calls in the same region. Statistically significant trends are indicated by an asterisk (*), defined as p < 0.05. CBD = Criteria-Based Dispatch; CI = confidence interval. CBD categories represent symptom-based dispatch classifications assigned during emergency telephone triage and do not necessarily reflect final confirmed clinical diagnoses. Records with missing geographic region data were excluded from this subgroup analysis.

**Supplementary Material Table 7.** Distribution of Total Emergency Calls by CBD Category in the North Region from 2012 to 2022 with Long-term Trend Analyses.

| **North** | **2012** | **2013** | **2014** | **2015** | **2016** | **2017** | **2018** | **2019** | **2020** | **2021** | **2022** | **Total** | **P for Trend (Number)** | **Mean Annual Percent Change (%)** | **95%CI (%)** | | **P for Trend (Percentage)** |
| --- | --- | --- | --- | --- | --- | --- | --- | --- | --- | --- | --- | --- | --- | --- | --- | --- | --- |
| **Total Calls** | 89,758 (6) | 94,523 (6.3) | 106,531 (7.1) | 112,179 (7.5) | 143,859 (9.6) | 145,066 (9.7) | 158,988 (10.6) | 167,743 (11.2) | 153,154 (10.3) | 159,717 (10.7) | 162,404 (10.9) | 1,493,922 | <0.001 |  | | | |
| CBD Category | | | | | | | | | | | | | | | | | |
| 1 | 8,004 (8.9) | 8,173 (8.7) | 9,760 (9.2) | 10,089 (9) | 13,025 (9.1) | 13,048 (9) | 13,990 (8.8) | 14,441 (8.6) | 13,282 (8.7) | 12,574 (7.9) | 13,155 (8.1) | 129,541 (8.7) | 0.002 | -0.09 | -0.15 | -0.02 | <0.001* |
| 2 | 548 (0.6) | 512 (0.5) | 637 (0.6) | 768 (0.7) | 1,108 (0.8) | 1,181 (0.8) | 1,636 (1) | 1,241 (0.7) | 1,484 (1) | 1,585 (1) | 1,704 (1.1) | 12,404 (0.8) | <0.001 | 0.05 | 0.03 | 0.07 | <0.001* |
| 3 | 784 (0.9) | 676 (0.7) | 1,012 (1) | 816 (0.7) | 907 (0.6) | 999 (0.7) | 1,105 (0.7) | 813 (0.5) | 839 (0.6) | 788 (0.5) | 789 (0.5) | 9,528 (0.6) | 0.919 | -0.04 | -0.06 | -0.02 | <0.001* |
| 4 | 1,237 (1.4) | 1,359 (1.4) | 1,613 (1.5) | 1,650 (1.5) | 2,170 (1.5) | 2,223 (1.5) | 2,473 (1.6) | 2,677 (1.6) | 2,533 (1.7) | 2,687 (1.7) | 2,713 (1.7) | 23,335 (1.6) | <0.001 | 0.03 | 0.02 | 0.03 | <0.001* |
| 5 | 7,535 (8.4) | 7,940 (8.4) | 9,374 (8.8) | 10,282 (9.2) | 13,320 (9.3) | 13,856 (9.6) | 15,170 (9.5) | 15,817 (9.4) | 14,729 (9.6) | 15,615 (9.8) | 16,738 (10.3) | 140,376 (9.4) | <0.001 | 0.17 | 0.13 | 0.21 | <0.001* |
| 6 | 38 (0) | 29 (0) | 67 (0.1) | 54 (0.1) | 59 (0) | 69 (0.1) | 69 (0) | 153 (0.1) | 273 (0.2) | 564 (0.4) | 639 (0.4) | 2,014 (0.1) | 0.002 | 0.03 | 0.01 | 0.05 | <0.001* |
| 7 | 3,368 (3.8) | 3,519 (3.7) | 3,757 (3.5) | 4,506 (4) | 6,207 (4.3) | 6,482 (4.5) | 7,741 (4.9) | 8,096 (4.8) | 8,126 (5.3) | 8,737 (5.5) | 8,611 (5.3) | 69,150 (4.6) | <0.001 | 0.2 | 0.16 | 0.25 | <0.001* |
| 8 | 169 (0.2) | 133 (0.1) | 180 (0.2) | 183 (0.2) | 281 (0.2) | 325 (0.2) | 308 (0.2) | 300 (0.2) | 325 (0.2) | 416 (0.3) | 385 (0.2) | 3,005 (0.2) | <0.001 | 0.01 | 0 | 0.01 | 0.01* |
| 9 | 1,068 (1.2) | 1,074 (1.1) | 1,343 (1.3) | 1,339 (1.2) | 1,882 (1.3) | 1,737 (1.2) | 2,092 (1.3) | 2,478 (1.5) | 2,427 (1.6) | 2,427 (1.5) | 2,546 (1.6) | 20,413 (1.4) | <0.001 | 0.05 | 0.03 | 0.06 | <0.001* |
| 10 | 12 (0) | 7 (0) | 25 (0) | 39 (0) | 43 (0) | 28 (0) | 31 (0) | 24 (0) | 20 (0) | 127 (0.1) | 120 (0.1) | 476 (0) | 0.015 | 0 | 0 | 0.01 | 0.04* |
| 12 | 1,584 (1.8) | 1,824 (1.9) | 1,787 (1.7) | 2,308 (2.1) | 3,362 (2.3) | 3,977 (2.7) | 4,351 (2.7) | 4,511 (2.7) | 4,767 (3.1) | 4,782 (3) | 5,026 (3.1) | 38,279 (2.6) | <0.001 | 0.15 | 0.11 | 0.19 | <0.001* |
| 13 | 1,175 (1.3) | 1,220 (1.3) | 1,397 (1.3) | 1,392 (1.2) | 1,768 (1.2) | 1,754 (1.2) | 1,931 (1.2) | 1,910 (1.1) | 1,879 (1.2) | 1,992 (1.3) | 1,981 (1.2) | 18,399 (1.2) | <0.001 | -0.01 | -0.02 | 0 | 0.03* |
| 14 | 659 (0.7) | 543 (0.6) | 654 (0.6) | 593 (0.5) | 756 (0.5) | 798 (0.6) | 805 (0.5) | 872 (0.5) | 996 (0.7) | 923 (0.6) | 1,096 (0.7) | 8,695 (0.6) | <0.001 | 0 | -0.02 | 0.01 | 0.8 |
| 15 | 1,171 (1.3) | 1,165 (1.2) | 1,232 (1.2) | 1,274 (1.1) | 1,710 (1.2) | 1,738 (1.2) | 1,779 (1.1) | 1,801 (1.1) | 1,531 (1) | 1,435 (0.9) | 1,371 (0.8) | 16,207 (1.1) | 0.123 | -0.04 | -0.05 | -0.03 | <0.001* |
| 16 | 3,289 (3.7) | 3,546 (3.8) | 4,024 (3.8) | 4,254 (3.8) | 5,397 (3.8) | 5,544 (3.8) | 6,142 (3.9) | 6,803 (4.1) | 6,212 (4.1) | 6,678 (4.2) | 6,355 (3.9) | 58,244 (3.9) | <0.001 | 0.04 | 0.02 | 0.06 | <0.001* |
| 17 | 13,596 (15.2) | 15,136 (16) | 17,186 (16.1) | 19,147 (17.1) | 23,771 (16.5) | 22,962 (15.8) | 24,556 (15.5) | 26,558 (15.8) | 23,646 (15.4) | 31,966 (20) | 30,612 (18.9) | 249,136 (16.7) | <0.001 | 0.26 | -0.02 | 0.55 | 0.07 |
| 18 | 365 (0.4) | 383 (0.4) | 583 (0.6) | 709 (0.6) | 1,170 (0.8) | 1,291 (0.9) | 1,560 (1) | 1746 (1) | 1,812 (1.2) | 1,966 (1.2) | 1,956 (1.2) | 13,541 (0.9) | <0.001 | 0.09 | 0.08 | 0.1 | <0.001* |
| 19 | 4,518 (5) | 5,199 (5.5) | 6,175 (5.8) | 6,366 (5.7) | 8,489 (5.9) | 8,365 (5.8) | 9,976 (6.3) | 10,931 (6.5) | 10,476 (6.8) | 10,319 (6.5) | 10,422 (6.4) | 91,236 (6.1) | <0.001 | 0.14 | 0.09 | 0.2 | <0.001* |
| 20 | 651 (0.7) | 785 (0.8) | 1,219 (1.1) | 1,299 (1.2) | 1,867 (1.3) | 1,600 (1.1) | 2,027 (1.3) | 1,836 (1.1) | 1,160 (0.8) | 938 (0.6) | 1,386 (0.9) | 14,768 (1) | 0.284 | -0.01 | -0.07 | 0.04 | 0.54 |
| 21 | 2,290 (2.6) | 2,173 (2.3) | 2,294 (2.2) | 2,139 (1.9) | 2,304 (1.6) | 2,285 (1.6) | 2,295 (1.4) | 2,273 (1.4) | 1,998 (1.3) | 1,738 (1.1) | 1,795 (1.1) | 23,584 (1.6) | 0.017 | -0.14 | -0.17 | -0.12 | <0.001* |
| 22 | 198 (0.2) | 192 (0.2) | 223 (0.2) | 259 (0.2) | 327 (0.2) | 310 (0.2) | 325 (0.2) | 304 (0.2) | 355 (0.2) | 329 (0.2) | 321 (0.2) | 3,143 (0.2) | 0.001 | 0 | 0 | 0 | 0.36 |
| 23 | 77 (0.1) | 68 (0.1) | 93 (0.1) | 74 (0.1) | 81 (0.1) | 93 (0.1) | 111 (0.1) | 102 (0.1) | 87 (0.1) | 104 (0.1) | 96 (0.1) | 986 (0.1) | 0.02 | 0 | 0 | 0 | 0.01* |
| 24 | 7,677 (8.6) | 8,300 (8.8) | 9,411 (8.8) | 10,223 (9.1) | 13,063 (9.1) | 13,784 (9.5) | 15,750 (9.9) | 16,837 (10) | 15,805 (10.3) | 16,007 (10) | 16,495 (10.2) | 143,352 (9.6) | <0.001 | 0.18 | 0.14 | 0.22 | <0.001* |
| 25 | 29,745 (33.1) | 30567 (32.3) | 32,485 (30.5) | 32,416 (28.9) | 40,792 (28.4) | 40,617 (28) | 42,765 (26.9) | 45,219 (27) | 38,392 (25.1) | 35,020 (21.9) | 36,092 (22.2) | 404,110 (27.1) | 0.079 | -1.07 | -1.25 | -0.89 | <0.001* |

**Footnote:** Values are presented as annual emergency call counts, with percentages in parentheses indicating the proportion of total emergency calls in the North region in the corresponding year. Mean annual percent change (MAPC) was estimated using linear regression models of annual category-specific proportions over time, with calendar year entered as a continuous independent variable. “P for Trend (Number)” represents the statistical significance of trends in absolute annual emergency call counts, whereas “P for Trend (Percentage)” reflects trends in annual category-specific proportions relative to total calls in the same region. Statistically significant trends are indicated by an asterisk (*), defined as p < 0.05. CBD = Criteria-Based Dispatch; CI = confidence interval. CBD categories represent symptom-based dispatch classifications assigned during emergency telephone triage and do not necessarily reflect final confirmed clinical diagnoses. Records with missing geographic region data were excluded from this subgroup analysis.

**Supplementary Material Table 8.** Distribution of Total Emergency Calls by CBD Category in the Northeast Region from 2012 to 2022 with Long-term Trend Analyses.

| **North-**  **east** | **2012** | **2013** | **2014** | **2015** | **2016** | **2017** | **2018** | **2019** | **2020** | **2021** | **2022** | **Total** | **P for Trend (Number)** | **Mean Annual Percent Change (%)** | **95%CI (%)** | | **P for Trend (Percentage)** |
| --- | --- | --- | --- | --- | --- | --- | --- | --- | --- | --- | --- | --- | --- | --- | --- | --- | --- |
| **Total Calls** | 554,527 (8.1) | 584,280 (8.5) | 587,248 (8.5) | 543,907 (7.9) | 689,843 (10) | 669,488 (9.7) | 706,399 (10.3) | 719,805 (10.5) | 621,809 (9) | 599,490 (8.7) | 609,032 (8.8) | 6,885,828 | <0.001 |  | | | |
| CBD Category | | | | | | | | | | | | | | | | | |
| 1 | 91,427 (16.5) | 95,712 (16.4) | 94,288 (16.1) | 83,616 (15.4) | 104,189 (15.1) | 95,433 (14.3) | 103,886 (14.7) | 102,091 (14.2) | 85,851 (13.8) | 72,898 (12.2) | 75,945 (12.5) | 1,005,336 (14.6) | 0.173 | -0.42 | -0.51 | -0.34 | <0.001* |
| 2 | 3,224 (0.6) | 3,147 (0.5) | 3,801 (0.7) | 3,506 (0.6) | 4,471 (0.7) | 4,756 (0.7) | 5,392 (0.8) | 4,885 (0.7) | 4,724 (0.8) | 4,949 (0.8) | 4,642 (0.8) | 47,497 (0.7) | 0.002 | 0.02 | 0.01 | 0.03 | <0.001* |
| 3 | 7,767 (1.4) | 7,286 (1.3) | 7,980 (1.4) | 6,434 (1.2) | 7,726 (1.1) | 8,167 (1.2) | 9,214 (1.3) | 6,556 (0.9) | 5,325 (0.9) | 4,940 (0.8) | 5,333 (0.9) | 76,728 (1.1) | 0.046 | -0.06 | -0.08 | -0.03 | <0.001* |
| 4 | 7,374 (1.3) | 6,724 (1.2) | 7,348 (1.3) | 6,548 (1.2) | 8,289 (1.2) | 8,616 (1.3) | 9,545 (1.4) | 9,100 (1.3) | 8,668 (1.4) | 8,855 (1.5) | 8,672 (1.4) | 89,739 (1.3) | 0.006 | 0.02 | 0.01 | 0.04 | 0.01* |
| 5 | 34,740 (6.3) | 35,897 (6.1) | 37,111 (6.3) | 34,666 (6.4) | 43,766 (6.3) | 44,918 (6.7) | 46,896 (6.6) | 45,149 (6.3) | 41,569 (6.7) | 41,630 (6.9) | 42,682 (7) | 449,024 (6.5) | 0.022 | 0.07 | 0.04 | 0.11 | <0.001* |
| 6 | 118 (0) | 113 (0) | 125 (0) | 127 (0) | 225 (0) | 286 (0) | 316 (0) | 537 (0.1) | 535 (0.1) | 819 (0.1) | 970 (0.2) | 4,171 (0.1) | <0.001 | 0.01 | 0.01 | 0.02 | <0.001* |
| 7 | 10,203 (1.8) | 10,961 (1.9) | 11,317 (1.9) | 11,141 (2.1) | 14,306 (2.1) | 14,463 (2.2) | 16,336 (2.3) | 15,858 (2.2) | 14,735 (2.4) | 16,664 (2.8) | 15,501 (2.6) | 151,485 (2.2) | <0.001 | 0.08 | 0.06 | 0.11 | <0.001* |
| 8 | 545 (0.1) | 588 (0.1) | 569 (0.1) | 589 (0.1) | 742 (0.1) | 813 (0.1) | 822 (0.1) | 1,011 (0.1) | 963 (0.2) | 975 (0.2) | 1,187 (0.2) | 8,804 (0.1) | <0.001 | 0.01 | 0.01 | 0.01 | <0.001* |
| 9 | 18,272 (3.3) | 18,018 (3.1) | 16,610 (2.8) | 14,960 (2.8) | 17,713 (2.6) | 15,367 (2.3) | 15,191 (2.2) | 15,062 (2.1) | 13,908 (2.2) | 12,769 (2.1) | 12,756 (2.1) | 170,626 (2.5) | <0.001 | -0.12 | -0.16 | -0.09 | <0.001* |
| 10 | 302 (0.1) | 250 (0) | 356 (0.1) | 272 (0.1) | 281 (0) | 308 (0.1) | 455 (0.1) | 323 (0) | 354 (0.1) | 4,576 (0.8) | 3,396 (0.6) | 10,873 (0.2) | 0.027 | 0.05 | 0.01 | 0.09 | 0.03* |
| 12 | 22,471 (4.1) | 23,391 (4) | 21,190 (3.6) | 17,969 (3.3) | 23,074 (3.3) | 23,450 (3.5) | 24,723 (3.5) | 25,392 (3.5) | 20,767 (3.3) | 18,240 (3) | 18,115 (3) | 238,782 (3.5) | 0.358 | -0.09 | -0.13 | -0.04 | <0.001* |
| 13 | 5,789 (1) | 5,673 (1) | 6,114 (1) | 6,117 (1.1) | 7,605 (1.1) | 7,979 (1.2) | 8,721 (1.2) | 9,047 (1.3) | 9,258 (1.5) | 9,476 (1.6) | 9,155 (1.5) | 84,934 (1.2) | <0.001 | 0.06 | 0.04 | 0.08 | <0.001* |
| 14 | 2,290 (0.4) | 2,036 (0.4) | 1,812 (0.3) | 1,811 (0.3) | 2,138 (0.3) | 2,129 (0.3) | 2,079 (0.3) | 2,169 (0.3) | 2,283 (0.4) | 2,207 (0.4) | 2,672 (0.4) | 23,626 (0.3) | 0.054 | 0 | -0.01 | 0.01 | 0.57 |
| 15 | 21,230 (3.8) | 18,282 (3.1) | 17,291 (2.9) | 13,950 (2.6) | 15,685 (2.3) | 13,667 (2) | 12,812 (1.8) | 11,465 (1.6) | 10,234 (1.7) | 8,541 (1.4) | 7,418 (1.2) | 150,575 (2.2) | <0.001 | -0.24 | -0.28 | -0.19 | <0.001* |
| 16 | 11,330 (2) | 12,184 (2.1) | 13,131 (2.2) | 13,133 (2.4) | 17,409 (2.5) | 17,977 (2.7) | 19,650 (2.8) | 21,177 (2.9) | 20,241 (3.3) | 20,846 (3.5) | 20,252 (3.3) | 187,330 (2.7) | <0.001 | 0.15 | 0.13 | 0.17 | <0.001* |
| 17 | 120,798 (21.8) | 136,977 (23.4) | 139,955 (23.8) | 135,739 (25) | 173,501 (25.2) | 169,091 (25.3) | 177,115 (25.1) | 185,927 (25.8) | 160,177 (25.8) | 163,821 (27.3) | 171,789 (28.2) | 1,734,890 (25.2) | 0.007 | 0.5 | 0.37 | 0.63 | <0.001* |
| 18 | 2,292 (0.4) | 2,460 (0.4) | 2,870 (0.5) | 3,292 (0.6) | 4,574 (0.7) | 5,468 (0.8) | 6,329 (0.9) | 7,484 (1) | 8,090 (1.3) | 8,736 (1.5) | 8,489 (1.4) | 60,084 (0.9) | <0.001 | 0.11 | 0.1 | 0.13 | <0.001* |
| 19 | 11,287 (2) | 12,237 (2.1) | 13,419 (2.3) | 13,974 (2.6) | 18,842 (2.7) | 19,371 (2.9) | 21,038 (3) | 24,178 (3.4) | 22,623 (3.6) | 23,587 (3.9) | 24,103 (4) | 204,659 (3) | <0.001 | 0.21 | 0.19 | 0.23 | <0.001* |
| 20 | 43,338 (7.8) | 49,913 (8.5) | 43,852 (7.5) | 35,964 (6.6) | 47,207 (6.8) | 34,733 (5.2) | 38,314 (5.4) | 37,282 (5.2) | 19,760 (3.2) | 8,832 (1.5) | 14,061 (2.3) | 373,256 (5.4) | 0.001 | -0.66 | -0.83 | -0.5 | <0.001* |
| 21 | 12,177 (2.2) | 10,583 (1.8) | 11,206 (1.9) | 9,834 (1.8) | 10,451 (1.5) | 10,212 (1.5) | 10,678 (1.5) | 10,173 (1.4) | 8,461 (1.4) | 7,954 (1.3) | 7,532 (1.2) | 109,261 (1.6) | 0.001 | -0.08 | -0.11 | -0.06 | <0.001* |
| 22 | 1,496 (0.3) | 1,517 (0.3) | 1,524 (0.3) | 1,428 (0.3) | 1,669 (0.2) | 1,691 (0.3) | 1,713 (0.2) | 1,714 (0.2) | 1,612 (0.3) | 1,435 (0.2) | 1,385 (0.2) | 17,184 (0.3) | 0.998 | 0.001 | 0.0001 | 0.002 | <0.001* |
| 23 | 1,568 (0.3) | 455 (0.1) | 482 (0.1) | 391 (0.1) | 591 (0.1) | 674 (0.1) | 596 (0.1) | 569 (0.1) | 550 (0.1) | 593 (0.1) | 575 (0.1) | 7,044 (0.1) | 0.269 | -0.01 | -0.02 | 0 | 0.2 |
| 24 | 43,565 (7.9) | 45,111 (7.7) | 46,992 (8) | 43,660 (8) | 54,016 (7.8) | 54,830 (8.2) | 57,162 (8.1) | 57,890 (8) | 51,950 (8.4) | 50,459 (8.4) | 50,890 (8.4) | 556,525 (8.1) | 0.047 | 0.06 | 0.03 | 0.09 | <0.001* |
| 25 | 80,924 (14.6) | 84,765 (14.5) | 87,905 (15) | 84,786 (15.6) | 111,373 (16.1) | 115,089 (17.2) | 117,416 (16.6) | 124,766 (17.3) | 109,171 (17.6) | 105,688 (17.6) | 101,512 (16.7) | 1,123,395 (16.3) | 0.025 | 0.31 | 0.19 | 0.44 | <0.001* |

**Footnote:** Values are presented as annual emergency call counts, with percentages in parentheses indicating the proportion of total emergency calls in the Northeast region in the corresponding year. Mean annual percent change (MAPC) was estimated using linear regression models of annual category-specific proportions over time, with calendar year entered as a continuous independent variable. “P for Trend (Number)” represents the statistical significance of trends in absolute annual emergency call counts, whereas “P for Trend (Percentage)” reflects trends in annual category-specific proportions relative to total calls in the same region. Statistically significant trends are indicated by an asterisk (*), defined as p < 0.05. CBD = Criteria-Based Dispatch; CI = confidence interval. CBD categories represent symptom-based dispatch classifications assigned during emergency telephone triage and do not necessarily reflect final confirmed clinical diagnoses. Records with missing geographic region data were excluded from this subgroup analysis.

**Supplementary Material Table 9.** Distribution of Total Emergency Calls by CBD Category in the Eastern Region from 2012 to 2022 with Long-term Trend Analyses.

| **Eastern** | **2012** | **2013** | **2014** | **2015** | **2016** | **2017** | **2018** | **2019** | **2020** | **2021** | **2022** | **Total** | **P for Trend (Number)** | **Mean Annual Percent Change (%)** | **95%CI (%)** | | **P for Trend (Percentage)** |
| --- | --- | --- | --- | --- | --- | --- | --- | --- | --- | --- | --- | --- | --- | --- | --- | --- | --- |
| **Total Calls** | 74,232 (7.7) | 73,157 (7.6) | 73,211 (7.6) | 64,544 (6.7) | 82,163 (8.5) | 85,452 (8.8) | 100,848 (10.4) | 110,321 (11.4) | 101,882 (10.5) | 100,688 (10.4) | 102,932 (10.6) | 969,430 | 0.001 |  | | | |
| CBD Category | | | | | | | | | | | | | | | | | |
| 1 | 4,968 (6.7) | 4,888 (6.7) | 4,715 (6.4) | 4,057 (6.3) | 5,095 (6.2) | 5,266 (6.2) | 6,127 (6.1) | 6,084 (5.5) | 6,090 (6) | 4,928 (4.9) | 5,315 (5.2) | 57,533 (5.9) | 0.105 | -0.16 | -0.22 | -0.11 | <0.001* |
| 2 | 211 (0.3) | 201 (0.3) | 224 (0.3) | 203 (0.3) | 273 (0.3) | 385 (0.5) | 508 (0.5) | 439 (0.4) | 482 (0.5) | 517 (0.5) | 515 (0.5) | 3,958 (0.4) | <0.001 | 0.03 | 0.02 | 0.04 | <0.001* |
| 3 | 702 (1) | 596 (0.8) | 586 (0.8) | 454 (0.7) | 587 (0.7) | 624 (0.7) | 672 (0.7) | 588 (0.5) | 562 (0.6) | 493 (0.5) | 501 (0.5) | 6,365 (0.7) | 0.156 | -0.04 | -0.05 | -0.03 | <0.001* |
| 4 | 749 (1) | 821 (1.1) | 819 (1.1) | 708 (1.1) | 915 (1.1) | 971 (1.1) | 1,164 (1.2) | 1,314 (1.2) | 1,524 (1.5) | 1,577 (1.6) | 1,547 (1.5) | 12,109 (1.3) | <0.001 | 0.05 | 0.03 | 0.07 | <0.001* |
| 5 | 5,027 (6.8) | 5,096 (7) | 5,218 (7.1) | 4,438 (6.9) | 5,829 (7.1) | 6,375 (7.5) | 7,723 (7.7) | 8,322 (7.5) | 8,411 (8.3) | 8,925 (8.9) | 9,613 (9.3) | 74,977 (7.7) | <0.001 | 0.23 | 0.16 | 0.31 | <0.001* |
| 6 | 38 (0.1) | 17 (0) | 35 (0.1) | 20 (0) | 47 (0.1) | 34 (0) | 107 (0.1) | 327 (0.3) | 463 (0.5) | 500 (0.5) | 541 (0.5) | 2,129 (0.2) | <0.001 | 0.06 | 0.03 | 0.08 | <0.001* |
| 7 | 1,033 (1.4) | 1,032 (1.4) | 1,123 (1.5) | 1,109 (1.7) | 1,455 (1.8) | 1,568 (1.8) | 1,964 (2) | 2,313 (2.1) | 2,602 (2.6) | 2,711 (2.7) | 2,559 (2.5) | 19,469 (2) | <0.001 | 0.13 | 0.1 | 0.16 | <0.001* |
| 8 | 50 (0.1) | 59 (0.1) | 44 (0.1) | 46 (0.1) | 53 (0.1) | 56 (0.1) | 74 (0.1) | 104 (0.1) | 104 (0.1) | 137 (0.1) | 158 (0.2) | 885 (0.1) | <0.001 | 0.01 | 0 | 0.01 | <0.001* |
| 9 | 1,164 (1.6) | 1,061 (1.5) | 1,100 (1.5) | 865 (1.3) | 1,189 (1.5) | 1,207 (1.4) | 1,370 (1.4) | 1,480 (1.3) | 1,420 (1.4) | 1,271 (1.3) | 1,347 (1.3) | 13,474 (1.4) | 0.017 | -0.02 | -0.03 | -0.01 | <0.001* |
| 10 | 19 (0) | 31 (0) | 19 (0) | 9 (0) | 11 (0) | 35 (0) | 68 (0.1) | 19 (0) | 10 (0) | 15 (0) | 12 (0) | 248 (0) | 0.802 | 0 | -0.01 | 0 | 0.4 |
| 12 | 759 (1) | 726 (1) | 798 (1.1) | 725 (1.1) | 671 (0.8) | 630 (0.7) | 863 (0.9) | 1,029 (0.9) | 1,322 (1.3) | 1,248 (1.2) | 1,137 (1.1) | 9,908 (1) | 0.004 | 0.02 | -0.02 | 0.05 | 0.39 |
| 13 | 474 (0.6) | 461 (0.6) | 441 (0.6) | 468 (0.7) | 509 (0.6) | 597 (0.7) | 704 (0.7) | 814 (0.7) | 886 (0.9) | 841 (0.8) | 870 (0.9) | 7,065 (0.7) | <0.001 | 0.03 | 0.01 | 0.04 | <0.001* |
| 14 | 555 (0.8) | 507 (0.7) | 469 (0.6) | 418 (0.7) | 435 (0.5) | 459 (0.5) | 559 (0.6) | 591 (0.5) | 591 (0.6) | 542 (0.5) | 630 (0.6) | 5,756 (0.6) | 0.062 | -0.02 | -0.03 | 0 | 0.02* |
| 15 | 1,750 (2.4) | 1,552 (2.1) | 1,567 (2.1) | 1,311 (2) | 1,620 (2) | 1,657 (1.9) | 1,866 (1.9) | 1,858 (1.7) | 1,913 (1.9) | 1,729 (1.7) | 1,533 (1.5) | 18,356 (1.9) | 0.308 | -0.07 | -0.09 | -0.05 | <0.001* |
| 16 | 1,874 (2.5) | 1,979 (2.7) | 2,237 (3.1) | 2,046 (3.2) | 2,672 (3.3) | 3,003 (3.5) | 3,804 (3.8) | 4,131 (3.7) | 3,971 (3.9) | 3,812 (3.8) | 4,131 (4) | 33,660 (3.5) | <0.001 | 0.15 | 0.12 | 0.17 | <0.001* |
| 17 | 8,586 (11.6) | 8,752 (12) | 8,858 (12.1) | 7,920 (12.3) | 10,743 (13.1) | 11,516 (13.5) | 12,725 (12.6) | 14,537 (13.2) | 12,907 (12.7) | 18,398 (18.3) | 15,755 (15.3) | 130,697 (13.5) | <0.001 | 0.43 | 0.13 | 0.72 | 0.01* |
| 18 | 493 (0.7) | 427 (0.6) | 593 (0.8) | 538 (0.8) | 791 (1) | 889 (1) | 1,153 (1.1) | 1,421 (1.3) | 1,585 (1.6) | 1,570 (1.6) | 1,709 (1.7) | 11,169 (1.2) | <0.001 | 0.11 | 0.1 | 0.13 | <0.001* |
| 19 | 1,844 (2.5) | 2,054 (2.8) | 2,198 (3) | 2,079 (3.2) | 2,767 (3.4) | 3,099 (3.6) | 3,919 (3.9) | 4,992 (4.5) | 4,938 (4.9) | 5,169 (5.1) | 5,753 (5.6) | 38,812 (4) | <0.001 | 0.3 | 0.27 | 0.34 | <0.001* |
| 20 | 498 (0.7) | 463 (0.6) | 407 (0.6) | 487 (0.8) | 636 (0.8) | 568 (0.7) | 898 (0.9) | 1,012 (0.9) | 611 (0.6) | 416 (0.4) | 713 (0.7) | 6,709 (0.7) | 0.185 | 0 | -0.03 | 0.03 | 0.91 |
| 21 | 2,906 (3.9) | 2,682 (3.7) | 2,709 (3.7) | 1,996 (3.1) | 2,138 (2.6) | 2,048 (2.4) | 2,190 (2.2) | 2,349 (2.1) | 2,047 (2) | 1,678 (1.7) | 1,756 (1.7) | 24,499 (2.5) | 0.001 | -0.24 | -0.29 | -0.2 | <0.001* |
| 22 | 259 (0.4) | 250 (0.3) | 227 (0.3) | 177 (0.3) | 254 (0.3) | 269 (0.3) | 324 (0.3) | 305 (0.3) | 289 (0.3) | 304 (0.3) | 262 (0.3) | 2,920 (0.3) | 0.082 | -0.01 | -0.01 | 0 | 0.01* |
| 23 | 164 (0.2) | 133 (0.2) | 136 (0.2) | 92 (0.1) | 168 (0.2) | 177 (0.2) | 209 (0.2) | 228 (0.2) | 191 (0.2) | 148 (0.2) | 168 (0.2) | 1,814 (0.2) | 0.169 | 0 | -0.01 | 0 | 0.31 |
| 24 | 4,803 (6.5) | 4,845 (6.6) | 4,889 (6.7) | 4,259 (6.6) | 5,543 (6.8) | 5,884 (6.9) | 7,174 (7.1) | 7,788 (7.1) | 7,758 (7.6) | 7,380 (7.3) | 8,042 (7.8) | 68,365 (7.1) | <0.001 | 0.12 | 0.09 | 0.16 | <0.001* |
| 25 | 35,306 (47.6) | 34,524 (47.2) | 33,799 (46.2) | 30,119 (46.7) | 37,762 (46) | 38,135 (44.6) | 44,683 (44.3) | 48,276 (43.8) | 41,205 (40.4) | 36379 (36.1) | 38365 (37.3) | 418,553 (43.2) | 0.102 | -1.09 | -1.46 | -0.73 | <0.001* |

**Footnote:** Values are presented as annual emergency call counts, with percentages in parentheses indicating the proportion of total emergency calls in the Eastern region in the corresponding year. Mean annual percent change (MAPC) was estimated using linear regression models of annual category-specific proportions over time, with calendar year entered as a continuous independent variable. “P for Trend (Number)” represents the statistical significance of trends in absolute annual emergency call counts, whereas “P for Trend (Percentage)” reflects trends in annual category-specific proportions relative to total calls in the same region. Statistically significant trends are indicated by an asterisk (*), defined as p < 0.05. CBD = Criteria-Based Dispatch; CI = confidence interval. CBD categories represent symptom-based dispatch classifications assigned during emergency telephone triage and do not necessarily reflect final confirmed clinical diagnoses. Records with missing geographic region data were excluded from this subgroup analysis.

**Supplementary Material Table 10.** Distribution of Total Emergency Calls by CBD Category in the Western Region from 2012 to 2022 with Long-term Trend Analyses

| **Western** | **2012** | **2013** | **2014** | **2015** | **2016** | **2017** | **2018** | **2019** | **2020** | **2021** | **2022** | **Total** | **P for Trend (Number)** | **Mean Annual Percent Change (%)** | **95%CI (%)** | | **P for Trend (Percentage)** |
| --- | --- | --- | --- | --- | --- | --- | --- | --- | --- | --- | --- | --- | --- | --- | --- | --- | --- |
| **Total Calls** | 31,119 (5.7) | 33,356 (6.1) | 34,660 (6.4) | 23,825 (4.4) | 45,845 (8.4) | 45,551 (8.3) | 65,443 (12) | 62,068 (11.4) | 68,639 (12.6) | 70,150 (12.8) | 65,490 (12) | 546,146 | <0.001 |  | | | |
| CBD Category | | | | | | | | | | | | | | | | | |
| 1 | 2,362 (7.6) | 2,401 (7.2) | 2,491 (7.2) | 1,593 (6.7) | 3,049 (6.7) | 2,993 (6.6) | 4,869 (7.4) | 4,332 (7) | 5,491 (8) | 4,719 (6.7) | 4,727 (7.2) | 39,027 (7.2) | 0.001 | 0 | -0.1 | 0.1 | 0.99 |
| 2 | 143 (0.5) | 149 (0.5) | 113 (0.3) | 78 (0.3) | 193 (0.4) | 265 (0.6) | 434 (0.7) | 353 (0.6) | 556 (0.8) | 611 (0.9) | 446 (0.7) | 3,341 (0.6) | <0.001 | 0.05 | 0.02 | 0.07 | <0.001* |
| 3 | 332 (1.1) | 363 (1.1) | 381 (1.1) | 187 (0.8) | 384 (0.8) | 391 (0.9) | 699 (1.1) | 461 (0.7) | 571 (0.8) | 525 (0.8) | 464 (0.7) | 4,758 (0.9) | 0.045 | -0.03 | -0.06 | -0.01 | 0.01* |
| 4 | 477 (1.5) | 535 (1.6) | 495 (1.4) | 305 (1.3) | 573 (1.3) | 635 (1.4) | 918 (1.4) | 827 (1.3) | 1,101 (1.6) | 1,082 (1.5) | 930 (1.4) | 7,878 (1.4) | 0.001 | 0 | -0.03 | 0.03 | 0.99 |
| 5 | 2,861 (9.2) | 3,089 (9.3) | 3,278 (9.5) | 2,173 (9.1) | 4,038 (8.8) | 4,164 (9.1) | 6,410 (9.8) | 5,866 (9.5) | 6,472 (9.4) | 7,338 (10.5) | 6,474 (9.9) | 52,163 (9.6) | <0.001 | 0.09 | 0.01 | 0.17 | 0.03* |
| 6 | 13 (0) | 11 (0) | 18 (0.1) | 8 (0) | 38 (0.1) | 32 (0.1) | 94 (0.1) | 82 (0.1) | 114 (0.2) | 118 (0.2) | 96 (0.2) | 624 (0.1) | <0.001 | 0.02 | 0.01 | 0.02 | <0.001* |
| 7 | 816 (2.6) | 883 (2.7) | 845 (2.4) | 585 (2.5) | 1,052 (2.3) | 1,182 (2.6) | 1,741 (2.7) | 1,751 (2.8) | 2,465 (3.6) | 2,484 (3.5) | 2,127 (3.3) | 15,931 (2.9) | <0.001 | 0.1 | 0.04 | 0.17 | 0.01* |
| 8 | 33 (0.1) | 37 (0.1) | 27 (0.1) | 31 (0.1) | 25 (0.1) | 36 (0.1) | 63 (0.1) | 59 (0.1) | 93 (0.1) | 115 (0.2) | 98 (0.2) | 617 (0.1) | 0.001 | 0.01 | 0 | 0.01 | 0.1 |
| 9 | 832 (2.7) | 799 (2.4) | 812 (2.3) | 498 (2.1) | 890 (1.9) | 874 (1.9) | 1,217 (1.9) | 1,115 (1.8) | 1,335 (1.9) | 1,196 (1.7) | 1,253 (1.9) | 10,821 (2) | 0.003 | -0.08 | -0.11 | -0.04 | <0.001* |
| 10 | 12 (0) | 9 (0) | 8 (0) | 3 (0) | 3 (0) | 4 (0) | 6 (0) | 13 (0) | 7 (0) | 273 (0.4) | 79 (0.1) | 417 (0.1) | 0.097 | 0.02 | -0.01 | 0.04 | 0.13 |
| 12 | 469 (1.5) | 480 (1.4) | 695 (2) | 416 (1.8) | 654 (1.4) | 708 (1.6) | 1,040 (1.6) | 977 (1.6) | 989 (1.4) | 951 (1.4) | 928 (1.4) | 8,307 (1.5) | 0.001 | -0.02 | -0.06 | 0.01 | 0.18 |
| 13 | 252 (0.8) | 266 (0.8) | 287 (0.8) | 205 (0.9) | 348 (0.8) | 388 (0.9) | 512 (0.8) | 513 (0.8) | 614 (0.9) | 649 (0.9) | 576 (0.9) | 4,610 (0.8) | <0.001 | 0.01 | 0 | 0.02 | 0.047* |
| 14 | 241 (0.8) | 229 (0.7) | 248 (0.7) | 140 (0.6) | 320 (0.7) | 292 (0.6) | 382 (0.6) | 389 (0.6) | 481 (0.7) | 465 (0.7) | 439 (0.7) | 3,626 (0.7) | <0.001 | -0.01 | -0.02 | 0.01 | 0.26 |
| 15 | 688 (2.2) | 784 (2.4) | 774 (2.2) | 507 (2.1) | 892 (2) | 859 (1.9) | 1,364 (2.1) | 1,100 (1.8) | 1,482 (2.2) | 1,241 (1.8) | 1,027 (1.6) | 10,718 (2) | 0.01 | -0.06 | -0.09 | -0.02 | <0.001* |
| 16 | 814 (2.6) | 964 (2.9) | 1,077 (3.1) | 823 (3.5) | 1,543 (3.4) | 1,500 (3.3) | 2,167 (3.3) | 2,100 (3.4) | 2,474 (3.6) | 2,484 (3.5) | 2,462 (3.8) | 18,408 (3.4) | <0.001 | 0.09 | 0.05 | 0.12 | <0.001* |
| 17 | 4,815 (15.5) | 5,071 (15.2) | 5,062 (14.6) | 3,590 (15.1) | 7,219 (15.8) | 7,045 (15.5) | 10,612 (16.2) | 10,521 (17) | 11,361 (16.6) | 16,212 (23.1) | 13,824 (21.1) | 95,332 (17.5) | <0.001 | 0.64 | 0.25 | 1.03 | 0.01* |
| 18 | 269 (0.9) | 259 (0.8) | 307 (0.9) | 278 (1.2) | 549 (1.2) | 567 (1.2) | 861 (1.3) | 989 (1.6) | 1,119 (1.6) | 1,218 (1.7) | 1,122 (1.7) | 7,538 (1.4) | <0.001 | 0.1 | 0.08 | 0.12 | <0.001* |
| 19 | 1,274 (4.1) | 1,261 (3.8) | 1,471 (4.2) | 1,129 (4.7) | 2,100 (4.6) | 2,069 (4.5) | 2,917 (4.5) | 3,145 (5.1) | 3,132 (4.6) | 3,067 (4.4) | 3,298 (5) | 24,863 (4.6) | <0.001 | 0.08 | 0.01 | 0.14 | 0.02* |
| 20 | 491 (1.6) | 383 (1.2) | 407 (1.2) | 256 (1.1) | 525 (1.2) | 416 (0.9) | 806 (1.2) | 736 (1.2) | 579 (0.8) | 336 (0.5) | 580 (0.9) | 5,515 (1) | 0.271 | -0.06 | -0.1 | -0.02 | 0.01* |
| 21 | 881 (2.8) | 888 (2.7) | 916 (2.6) | 594 (2.5) | 991 (2.2) | 856 (1.9) | 1,275 (2) | 1,056 (1.7) | 1,157 (1.7) | 1,028 (1.5) | 1,062 (1.6) | 10,704 (2) | 0.065 | -0.14 | -0.17 | -0.11 | <0.001* |
| 22 | 104 (0.3) | 120 (0.4) | 112 (0.3) | 62 (0.3) | 105 (0.2) | 125 (0.3) | 179 (0.3) | 164 (0.3) | 188 (0.3) | 174 (0.3) | 147 (0.2) | 1,480 (0.3) | 0.012 | -0.01 | -0.02 | 0 | 0.01* |
| 23 | 41 (0.1) | 41 (0.1) | 51 (0.2) | 34 (0.1) | 73 (0.2) | 63 (0.1) | 77 (0.1) | 99 (0.2) | 87 (0.1) | 89 (0.1) | 73 (0.1) | 728 (0.1) | 0.002 | 0 | 0 | 0 | 0.38 |
| 24 | 2,539 (8.2) | 2,759 (8.3) | 2,665 (7.7) | 1,833 (7.7) | 3,539 (7.7) | 3,546 (7.8) | 5,203 (8) | 4,886 (7.9) | 5,601 (8.2) | 5,359 (7.6) | 5,370 (8.2) | 43,300 (7.9) | <0.001 | 0 | -0.06 | 0.05 | 0.9 |
| 25 | 10,360 (33.3) | 11,575 (34.7) | 12,120 (35) | 8,497 (35.7) | 16,742 (36.5) | 16,541 (36.3) | 21,597 (33) | 20,534 (33.1) | 21,170 (30.8) | 18,416 (26.3) | 17,888 (27.3) | 175,440 (32.1) | 0.004 | -0.77 | -1.3 | -0.24 | 0.01* |

**Footnote:** Values are presented as annual emergency call counts, with percentages in parentheses indicating the proportion of total emergency calls in the Western region in the corresponding year. Mean annual percent change (MAPC) was estimated using linear regression models of annual category-specific proportions over time, with calendar year entered as a continuous independent variable. “P for Trend (Number)” represents the statistical significance of trends in absolute annual emergency call counts, whereas “P for Trend (Percentage)” reflects trends in annual category-specific proportions relative to total calls in the same region. Statistically significant trends are indicated by an asterisk (*), defined as p < 0.05. CBD = Criteria-Based Dispatch; CI = confidence interval. CBD categories represent symptom-based dispatch classifications assigned during emergency telephone triage and do not necessarily reflect final confirmed clinical diagnoses. Records with missing geographic region data were excluded from this subgroup analysis.

**Supplementary Material Table 11.** Distribution of Total Emergency Calls by CBD Category in the South Region from 2012 to 2022 with Long-term Trend Analyses

| **South** | **2012** | **2013** | **2014** | **2015** | **2016** | **2017** | **2018** | **2019** | **2020** | **2021** | **2022** | **Total** | **P for Trend (Number)** | **Mean Annual Percent Change (%)** | **95%CI (%)** | | **P for Trend (Percentage)** |
| --- | --- | --- | --- | --- | --- | --- | --- | --- | --- | --- | --- | --- | --- | --- | --- | --- | --- |
| **Total Calls** | 103,643 (5.4) | 117,463 (6.2) | 128,068 (6.7) | 129,736 (6.8) | 176,295 (9.3) | 186,867 (9.8) | 211,778 (11.1) | 227,376 (11.9) | 205,124 (10.8) | 214,874 (11.3) | 203,414 (10.7) | **1,904,638** | **<0.001** |  | | | |
| CBD Category | | | | | | | | | | | | | | | | | |
| 1 | 9,743 (9.4) | 11,148 (9.5) | 12,123 (9.5) | 12,342 (9.5) | 16762 (9.5) | 16,415 (8.8) | 18,339 (8.7) | 19,261 (8.5) | 19,235 (9.4) | 15,312 (7.1) | 16,289 (8) | 166,969 (8.8) | 0.005 | -0.18 | -0.29 | -0.06 | 0.01* |
| 2 | 464 (0.5) | 485 (0.4) | 563 (0.4) | 604 (0.5) | 774 (0.4) | 952 (0.5) | 1,296 (0.6) | 1,342 (0.6) | 1,366 (0.7) | 1,511 (0.7) | 1,364 (0.7) | 10,721 (0.6) | <0.001 | 0.03 | 0.02 | 0.04 | <0.001* |
| 3 | 1,128 (1.1) | 1,312 (1.1) | 1,448 (1.1) | 1,455 (1.1) | 1,841 (1) | 1,794 (1) | 2,099 (1) | 2,005 (0.9) | 1,898 (0.9) | 1,725 (0.8) | 1,581 (0.8) | 18,286 (1) | 0.028 | -0.04 | -0.05 | -0.03 | <0.001* |
| 4 | 868 (0.8) | 963 (0.8) | 1,104 (0.9) | 1,063 (0.8) | 1,378 (0.8) | 1,528 (0.8) | 1,765 (0.8) | 1,963 (0.9) | 2,053 (1) | 2,062 (1) | 2,098 (1) | 16,845 (0.9) | <0.001 | 0.02 | 0.01 | 0.03 | 0.01* |
| 5 | 8,218 (7.9) | 9,284 (7.9) | 10,608 (8.3) | 11,069 (8.5) | 15,112 (8.6) | 16,954 (9.1) | 19,116 (9) | 20,643 (9.1) | 18,677 (9.1) | 19,537 (9.1) | 20,195 (9.9) | 169,413 (8.9) | <0.001 | 0.17 | 0.13 | 0.22 | <0.001* |
| 6 | 74 (0.1) | 89 (0.1) | 128 (0.1) | 192 (0.2) | 231 (0.1) | 190 (0.1) | 269 (0.1) | 347 (0.2) | 381 (0.2) | 443 (0.2) | 593 (0.3) | 2,937 (0.2) | <0.001 | 0.02 | 0.01 | 0.02 | <0.001* |
| 7 | 3,035 (2.9) | 3,363 (2.9) | 4,065 (3.2) | 4,482 (3.5) | 5,535 (3.1) | 5,996 (3.2) | 7,018 (3.3) | 8,524 (3.8) | 8,558 (4.2) | 9,004 (4.2) | 8,419 (4.1) | 67,999 (3.6) | <0.001 | 0.14 | 0.09 | 0.18 | <0.001* |
| 8 | 103 (0.1) | 99 (0.1) | 107 (0.1) | 137 (0.1) | 192 (0.1) | 198 (0.1) | 210 (0.1) | 307 (0.1) | 311 (0.2) | 303 (0.1) | 311 (0.2) | 2,278 (0.1) | <0.001 | 0.007 | 0.001 | 0.01 | <0.001* |
| 9 | 1,556 (1.5) | 1,565 (1.3) | 1,790 (1.4) | 1,643 (1.3) | 2,013 (1.1) | 1,852 (1) | 2,045 (1) | 2,409 (1.1) | 2,735 (1.3) | 2,644 (1.2) | 3,146 (1.6) | 23,398 (1.2) | <0.001 | -0.01 | -0.05 | 0.04 | 0.66 |
| 10 | 21 (0) | 22 (0) | 24 (0) | 15 (0) | 17 (0) | 20 (0) | 33 (0) | 29 (0) | 18 (0) | 22 (0) | 24 (0) | 245 (0) | 0.482 | 0.0001 | 0.00001 | 0.003 | 0.01* |
| 12 | 2,514 (2.4) | 2,799 (2.4) | 3,540 (2.8) | 4,172 (3.2) | 5,093 (2.9) | 4,752 (2.5) | 4,815 (2.3) | 5,019 (2.2) | 4,806 (2.3) | 3,921 (1.8) | 3,529 (1.7) | 44,960 (2.4) | 0.123 | -0.09 | -0.16 | -0.01 | 0.03* |
| 13 | 602 (0.6) | 739 (0.6) | 829 (0.7) | 824 (0.6) | 1,164 (0.7) | 1,211 (0.7) | 1,528 (0.7) | 1,837 (0.8) | 2,121 (1) | 2,350 (1.1) | 2,047 (1) | 15,252 (0.8) | <0.001 | 0.05 | 0.03 | 0.07 | <0.001* |
| 14 | 503 (0.5) | 531 (0.5) | 538 (0.4) | 462 (0.4) | 716 (0.4) | 712 (0.4) | 758 (0.4) | 904 (0.4) | 919 (0.5) | 932 (0.4) | 1,081 (0.5) | 8,056 (0.4) | <0.001 | 0 | -0.01 | 0.01 | 0.65 |
| 15 | 4,794 (4.6) | 5,398 (4.6) | 5,994 (4.7) | 5,759 (4.4) | 7,388 (4.2) | 7,859 (4.2) | 8,431 (4) | 8,446 (3.7) | 8,433 (4.1) | 7,159 (3.3) | 6,497 (3.2) | 76,158 (4) | 0.024 | -0.14 | -0.18 | -0.1 | <0.001* |
| 16 | 2,546 (2.5) | 2,964 (2.5) | 3,289 (2.6) | 3,204 (2.5) | 4,415 (2.5) | 4,797 (2.6) | 5,437 (2.6) | 6,263 (2.8) | 5,882 (2.9) | 5,842 (2.7) | 6,116 (3) | 50,755 (2.7) | <0.001 | 0.05 | 0.03 | 0.07 | <0.001* |
| 17 | 13,864 (13.4) | 16,737 (14.3) | 19,386 (15.1) | 19,425 (15) | 31,603 (17.9) | 35,635 (19.1) | 41,255 (19.5) | 42,677 (18.8) | 36,098 (17.6) | 62,718 (29.2) | 44,305 (21.8) | 363,703 (19.1) | <0.001 | 1.08 | 0.48 | 1.67 | <0.001* |
| 18 | 735 (0.7) | 931 (0.8) | 1,156 (0.9) | 1,257 (1) | 1,745 (1) | 2,107 (1.1) | 2,619 (1.2) | 3,180 (1.4) | 3,555 (1.7) | 3,567 (1.7) | 3,798 (1.9) | 24,650 (1.3) | <0.001 | 0.12 | 0.1 | 0.14 | <0.001* |
| 19 | 5,436 (5.2) | 6,143 (5.2) | 6,370 (5) | 6,684 (5.2) | 8,689 (4.9) | 9,434 (5.1) | 10,945 (5.2) | 12,211 (5.4) | 10,111 (4.9) | 8,705 (4.1) | 9,359 (4.6) | 94,087 (4.9) | 0.007 | -0.07 | -0.13 | 0 | 0.045* |
| 20 | 2,969 (2.9) | 3,292 (2.8) | 3,841 (3) | 3,786 (2.9) | 6,048 (3.4) | 5,102 (2.7) | 6,261 (3) | 6,151 (2.7) | 3,651 (1.8) | 2,160 (1) | 3,844 (1.9) | 47,105 (2.5) | 0.79 | -0.15 | -0.26 | -0.04 | 0.01* |
| 21 | 2,767 (2.7) | 2,893 (2.5) | 3,009 (2.4) | 2,706 (2.1) | 2,854 (1.6) | 2,586 (1.4) | 2,589 (1.2) | 2,651 (1.2) | 2,475 (1.2) | 2,257 (1.1) | 2,308 (1.1) | 29,095 (1.5) | <0.001 | -0.17 | -0.22 | -0.13 | <0.001* |
| 22 | 329 (0.3) | 383 (0.3) | 412 (0.3) | 389 (0.3) | 444 (0.3) | 441 (0.2) | 599 (0.3) | 568 (0.3) | 561 (0.3) | 426 (0.2) | 518 (0.3) | 5,070 (0.3) | 0.013 | -0.01 | -0.02 | 0 | <0.001* |
| 23 | 163 (0.2) | 239 (0.2) | 206 (0.2) | 217 (0.2) | 315 (0.2) | 359 (0.2) | 430 (0.2) | 463 (0.2) | 306 (0.2) | 253 (0.1) | 320 (0.2) | 3,271 (0.2) | 0.072 | 0 | -0.01 | 0 | 0.35 |
| 24 | 7,710 (7.4) | 8,827 (7.5) | 9,533 (7.4) | 10,055 (7.8) | 13,373 (7.6) | 14,711 (7.9) | 16,984 (8) | 18,402 (8.1) | 17,047 (8.3) | 15,679 (7.3) | 16,236 (8) | 148,557 (7.8) | <0.001 | 0.05 | -0.01 | 0.11 | 0.1 |
| 25 | 33,501 (32.3) | 37,257 (31.7) | 38,005 (29.7) | 37,794 (29.1) | 48,593 (27.6) | 51,262 (27.4) | 56,937 (26.9) | 61,774 (27.2) | 53,927 (26.3) | 46,342 (21.6) | 49436 (24.3) | 514,828 (27) | 0.011 | -0.87 | -1.12 | -0.61 | <0.001* |

**Footnote:** Values are presented as annual emergency call counts, with percentages in parentheses indicating the proportion of total emergency calls in the South region in the corresponding year. Mean annual percent change (MAPC) was estimated using linear regression models of annual category-specific proportions over time, with calendar year entered as a continuous independent variable. “P for Trend (Number)” represents the statistical significance of trends in absolute annual emergency call counts, whereas “P for Trend (Percentage)” reflects trends in annual category-specific proportions relative to total calls in the same region. Statistically significant trends are indicated by an asterisk (), defined as p < 0.05. CBD = Criteria-Based Dispatch; CI = confidence interval. CBD categories represent symptom-based dispatch classifications assigned during emergency telephone triage and do not necessarily reflect final confirmed clinical diagnoses. Records with missing geographic region data were excluded from this subgroup analysis.
